# Supplementary material for: Tackling recalcitrant Pseudomonas aeruginosa infections in critical illness via anti-virulence monotherapy
Source: PubMed Central journal article supplement (PMC9428149; doi:10.1038/s41467-022-32833-9), 2022-08-30

## Supplementary Information

### Tackling Recalcitrant *Pseudomonas aeruginosa* Infections In Critical Illness via Anti-virulence Monotherapy

Vijay K. Singh<sup>1,2,3</sup>, Marianna Almpiani<sup>1,2,3</sup>, Damien Maura<sup>1,2,3,11</sup>, Tomoe Kitao<sup>1,2,3,11</sup>, Livia Ferrari<sup>4</sup>, Stefano Fontana<sup>5</sup>, Gabriella Bergamini<sup>4</sup>, Elisa Calcaterra<sup>4</sup>, Chiara Pignaffo<sup>5</sup>, Michele Negri<sup>6</sup>, Thays de Oliveira Pereira<sup>7</sup>, Frances Skinner<sup>8</sup>, Manos Gkikas<sup>8</sup>, Danielle Andreotti<sup>9</sup>, Antonio Felici<sup>10,11</sup>, Eric Déziel<sup>7</sup>, Francois Lépine<sup>7</sup>, Laurence G. Rahme<sup>1,2,3\*</sup>

<sup>1</sup>Department of Surgery, Harvard Medical School and Massachusetts General Hospital, Boston, USA

<sup>2</sup>Shriners Hospitals for Children, Boston, USA

<sup>3</sup>Department of Microbiology, Harvard Medical School, Boston, MA 02115, USA

<sup>4</sup>Translational Biology Department, Aptuit (Verona) S.r.l, *an Evotec Company*, 37135 Via A. Fleming 4, Verona, Italy

<sup>5</sup>DMPK Department, Aptuit (Verona) S.r.l, *an Evotec Company*, 37135 Via A. Fleming 4, Verona, Italy

<sup>6</sup>*In vitro* Chemotherapy Laboratory, Aptuit (Verona) S.r.l., *an Evotec Company*, 37135 Via A. Fleming 4, Verona, Italy

<sup>7</sup>Centre Armand-Frappier Santé Biotechnologie, Institut National de la Recherche Scientifique (INRS), Laval, Quebec, H7V 1B7 Canada

<sup>8</sup>Department of Chemistry, University of Massachusetts Lowell, Lowell, MA 01854, USA

<sup>9</sup>Global Synthetic Chemistry Department, Aptuit (Verona) S.r.l., *an Evotec Company*, 37135 Via A. Fleming 4, Verona, Italy

<sup>10</sup>Department of Microbiology Discovery, *In Vitro* Biology, Aptuit (Verona) S.r.l., *an Evotec Company*, 37135 Via A. Fleming 4, Verona, Italy

<sup>11</sup>Current address:

D. Maura, Voyager Therapeutics, Cambridge, MA 02139, USA

T. Kitao, Department of Microbiology, Graduate School of Medicine, Gifu University, Gifu 501-1194, Japan

A Felici, Academic Partnership, Evotec SE, 37135 Via A. Fleming 4, Verona, Italy

**\*Corresponding author:**

e-mail: rahme@molbio.mgh.harvard.edu (LGR)

address: Massachusetts General Hospital, 340 Their Research Building, 50 Blossom Street, Boston, MA 02114; phone: 617-724-5003

These authors contributed equally: Vijay K. Singh, Marianna Almpiani, Damien Maura

### Structure activity relationship (SAR) studies.

The assessment of inhibitors potency was based on pyocyanin production, *pqs* operon gene expression using the *pqsA*-GFP reporter, and the production of the MvfR-regulated low molecular weight molecules HHQ, PQS, HQNO, DHQ, 2-AA in the presence of 50 $\mu$ M of each inhibitor. Assessment of the anthranilic acid (AA) production was used as additional control of the inhibition of the low molecular weight molecules since their synthesis depends on AA, their primary precursor.

### Supplementary Table 1. Optimization starting with M17

SAR studies of N 2-[(4-fluoro-2-methylphenyl)amino]-N-phenylacetamide as anti-MvfR agents via exploration of the aryl portion of the N-phenylacetamide side.

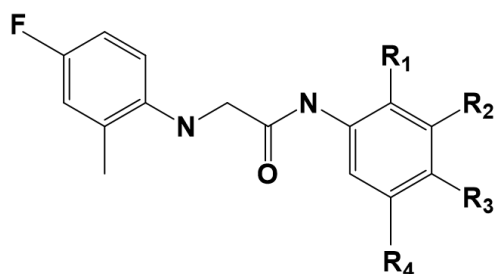

| Compound | R <sub>1</sub> R <sub>2</sub> R <sub>3</sub> R <sub>4</sub>                         |                 |                                                                                     |                | % Production |                  |     |     |      |      |     |     |
|----------|-------------------------------------------------------------------------------------|-----------------|-------------------------------------------------------------------------------------|----------------|--------------|------------------|-----|-----|------|------|-----|-----|
|          | R <sub>1</sub>                                                                      | R <sub>2</sub>  | R <sub>3</sub>                                                                      | R <sub>4</sub> | Pyocyanin    | <i>pqsA</i> -GFP | HHQ | PQS | HQNO | 2-AA | DHQ | AA  |
| M17      |                                                                                     |                 | CN                                                                                  |                | 67           | 32               | 3   | 11  | 17   | 101  | 135 | 100 |
| G1       |                                                                                     | CN              |                                                                                     |                | 103          | 84               | 100 | 109 | 101  | 122  | -   | -   |
| G2       |                                                                                     |                 | CF <sub>3</sub>                                                                     |                | 61           | 46               | 110 | 93  | 86   | 68   | 81  | -   |
| G3       | CN                                                                                  |                 |                                                                                     |                | 113          | 96               | 99  | 122 | 111  | 123  | -   | -   |
| G4       |                                                                                     |                 | F                                                                                   |                | 84           | 92               | 95  | 88  | 92   | 80   | 85  | -   |
| D2       | Br                                                                                  |                 |                                                                                     |                | 101          | 96               | -   | -   | -    | -    | -   | -   |
| D5       |                                                                                     |                 | 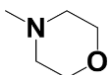 |                | 102          | 100              | -   | -   | -    | -    | -   | -   |
| D7       | Me                                                                                  |                 | Br                                                                                  |                | 89           | 70               | -   | -   | -    | -    | -   | -   |
| D9       |                                                                                     |                 |  |                | 107          | 105              | -   | -   | -    | -    | -   | -   |
| D10      | F                                                                                   |                 |                                                                                     | F              | 90           | 89               | -   | -   | -    | -    | -   | -   |
| D12      | Br                                                                                  |                 | CH <sub>3</sub>                                                                     |                | 108          | 92               | -   | -   | -    | -    | -   | -   |
| D13      |                                                                                     | CN              |                                                                                     |                | 100          | 90               | -   | -   | -    | -    | -   | -   |
| D14      |                                                                                     | NO <sub>2</sub> |                                                                                     |                | 85           | 77               | -   | -   | -    | -    | -   | -   |
| D15      |                                                                                     |                 | OMe                                                                                 |                | 102          | 87               | -   | -   | -    | -    | -   | -   |
| D19      |                                                                                     |                 |  |                | 109          | 100              | -   | -   | -    | -    | -   | -   |
| D21      | Me                                                                                  |                 | Me                                                                                  |                | 113          | 87               | -   | -   | -    | -    | -   | -   |
| D22      |                                                                                     | Cl              |                                                                                     |                | 96           | 71               | -   | -   | -    | -    | -   | -   |
| D30      |  |                 |                                                                                     |                | 91           | 94               | -   | -   | -    | -    | -   | -   |
| D31      |                                                                                     | CH <sub>3</sub> | Br                                                                                  |                | 69           | 47               | -   | -   | -    | -    | -   | -   |
| D32      |                                                                                     | OMe             |                                                                                     |                | 92           | 94               | -   | -   | -    | -    | -   | -   |

**Supplementary Table 2.** SAR studies of N-(4-cyanophenyl)-2-(phenylamino) acetamide as anti-MvfR agents via exploration of the aryl portion of the 2-phenylamino portion of the molecule.

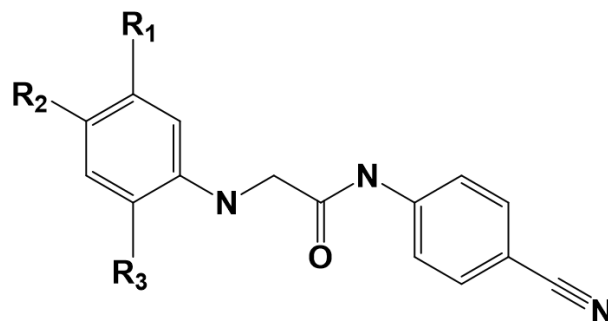

| Compound       |                |                                   | % Production |          |     |     |      |      |     |    |
|----------------|----------------|-----------------------------------|--------------|----------|-----|-----|------|------|-----|----|
| R <sub>1</sub> | R <sub>2</sub> | R <sub>3</sub>                    | Pyocyanin    | pqsA-GFP | HHQ | PQS | HQNO | 2-AA | DHQ | AA |
| G8             | F              |                                   | 86           | 63       | 87  | 124 | 108  | 112  | -   | -  |
| G9             |                | Me                                | 94           | 93       | 76  | 124 | 92   | 64   | 59  | -  |
| D3             |                | Et                                | 97           | 92       | -   | -   | -    | -    | -   | -  |
| D6             | F              |                                   | 91           | 68       | -   | -   | -    | -    | -   | -  |
| D16            |                | Cl                                | 43           | 18       | -   | -   | -    | -    | -   | -  |
| D18            | F              | Me                                | 69           | 28       | -   | -   | -    | -    | -   | -  |
| D25            |                | F                                 | 97           | 84       | -   | -   | -    | -    | -   | -  |
| D28            | F              | CH <sub>3</sub>                   | 60           | 42       | -   | -   | -    | -    | -   | -  |
| D33            |                | CH(CH <sub>3</sub> ) <sub>2</sub> | 59           | 53       | -   | -   | -    | -    | -   | -  |

**Supplementary Table 3.** SAR studies retaining the 4-cyanophenyl and exploring the central linker and the effect of the substituent on the second Aryl group.

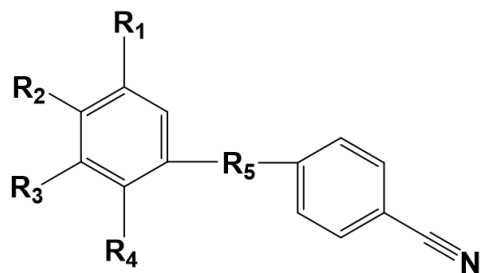

| Compound       |                |                |  | % Production |                  |     |     |      |      |     |     |
|----------------|----------------|----------------|--|--------------|------------------|-----|-----|------|------|-----|-----|
| R <sub>2</sub> | R <sub>4</sub> | R <sub>5</sub> |  | Pyocyanin    | <i>pqsA</i> -GFP | HHQ | PQS | HQNO | 2-AA | DHQ | AA  |
| G5             | F              | Me             |  | 98           | 98               | 114 | 114 | 111  | 63   | 83  | 54  |
| G6             | F              | Me             |  | 110          | 87               | 106 | 115 | 131  | 152  | -   | -   |
| D38            | F              | Me             |  | 108          | 90               | 98  | 96  | 100  | 101  | 84  | 54  |
| D39            | F              | Me             |  | 110          | 91               | 96  | 93  | 102  | 106  | 96  | 68  |
| D40            | F              | Me             |  | 115          | 96               | 102 | 100 | 109  | 113  | 85  | 81  |
| D24            | F              |                |  | 59           | 26               | -   | -   | -    | -    | -   | -   |
| D34            | F              |                |  | 91           | 80               | 97  | 97  | 96   | 113  | 100 | 101 |
| D37            | F              |                |  | 106          | 97               | 98  | 110 | 99   | 103  | 105 | 90  |
| D36            | F              |                |  | 16           | 10               | 57  | 47  | 59   | 37   | 68  | 187 |
| D44            | F              |                |  | 94           | 71               | 94  | 92  | 94   | 92   | 97  | 32  |
| D47            | F              |                |  | 99           | 78               | 95  | 94  | 93   | 100  | 100 | 42  |
| D83            | CN             |                |  | 114          | -                | -   | -   | -    | -    | -   | -   |

|     |                             |                                                                                   |     |    |   |   |   |   |   |   |
|-----|-----------------------------|-----------------------------------------------------------------------------------|-----|----|---|---|---|---|---|---|
| D76 | F                           | 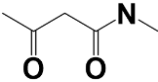 | 77  | -  | - | - | - | - | - | - |
| D84 | F                           |  | 102 | -  | - | - | - | - | - | - |
| D86 | F                           |  | 88  | -  | - | - | - | - | - | - |
| D89 | F                           |  | 95  | -  | - | - | - | - | - | - |
| D93 | $\text{C}_6\text{H}_6$<br>O |  | 91  | 88 | - | - | - | - | - | - |

---

**Supplementary Table 4.** SAR studies exploring one side of the N'-(4-cyanophenyl)-N-aryl Malonamide

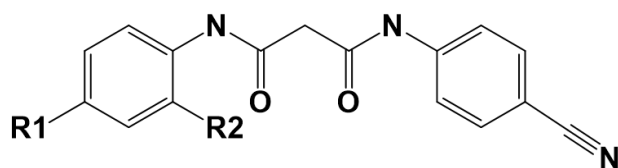

| Compound |                                 |                | % Production |                  |     |     |      |      |     |     |
|----------|---------------------------------|----------------|--------------|------------------|-----|-----|------|------|-----|-----|
| Name     | R <sub>1</sub>                  | R <sub>2</sub> | Pyocyanin    | <i>pqsA</i> -GFP | HHQ | PQS | HQNO | 2-AA | DHQ | AA  |
| D41      | Cl                              |                | 6            | 8                | 2   | 9   | 15   | 6    | 11  | 739 |
| D42      | Br                              |                | 6            | 8                | 2   | 8   | 14   | 6    | 11  | 701 |
| D43      | CN                              |                | 8            | 8                | 22  | 24  | 39   | 19   | 34  | 531 |
| D48      | F                               | Me             | 60           | 44               | 96  | 90  | 94   | 77   | 91  | 59  |
| D49      | COMe                            |                | 66           | 28               | 120 | 119 | 101  | 90   | 106 | 131 |
| D50      | COCF <sub>3</sub>               |                | 84           | 102              | 107 | 104 | 103  | 140  | 89  | 176 |
| D51      | NO <sub>2</sub>                 |                | 3            | 10               | 3   | 6   | 18   | 7    | 12  | 263 |
| D52      | NH <sub>2</sub>                 |                | 87           | 90               | 92  | 86  | 92   | 101  | 103 | 115 |
| D53      | NHCOMe                          |                | 103          | 85               | 75  | 88  | 85   | 93   | 98  | 56  |
| D54      | NHCOCF <sub>3</sub>             |                | 94           | 85               | 103 | 101 | 101  | 117  | 108 | 82  |
| D55      | NHSO <sub>2</sub> Me            |                | 100          | 131              | 130 | 115 | 98   | 95   | 80  | 117 |
| D56      | I                               |                | 13           | 6                | 63  | 62  | 69   | 72   | 136 | 180 |
| D69      | CF <sub>3</sub>                 |                | 4            | 2                | 6   | 16  | 40   | 15   | 13  | 920 |
| D57      | C <sub>6</sub> H <sub>5</sub> O |                | 6            | 4                | 58  | 36  | 54   | 38   | 65  | 298 |

**Supplementary Table 5.** SAR studies retaining the 4-phenoxy phenyl motif of the NAMs and exploring the effect of the substituents on the second Aryl group

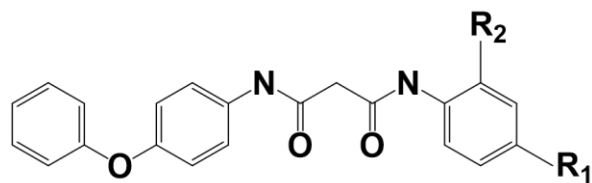

| Compound |                 |                 | % Production |                 |     |     |      |      |     |     |
|----------|-----------------|-----------------|--------------|-----------------|-----|-----|------|------|-----|-----|
| Name     | R <sub>1</sub>  | R <sub>2</sub>  | Pyocyanin    | <i>pqsA-GFP</i> | HHQ | PQS | HQNO | 2-AA | DHQ | AA  |
| D57      | CN              |                 | 6            | 4               | 58  | 36  | 54   | 38   | 65  | 298 |
| D58      | NO <sub>2</sub> |                 | 6            | 9               | 20  | 19  | 23   | 22   | 45  | 101 |
| D59      | I               |                 | 72           | 81              | 99  | 93  | 97   | 92   | 93  | 131 |
| D60      | NO <sub>2</sub> | NH <sub>2</sub> | 6            | -               | -   | -   | -    | -    | -   | -   |
| D61      | NO <sub>2</sub> | OH              | 6            | 7               | 1   | 6   | 8    | 12   | 8   | 112 |
| D62      | CN              | NH <sub>2</sub> | 7            | 6               | 2   | 9   | 13   | 10   | 16  | 107 |
| D63      | CN              | OH              | 6            | 7               | 0   | 4   | 4    | 5    | 4   | 68  |
| D64      | Br              |                 | 48           | 61              | 88  | 100 | 88   | 78   | 85  | 50  |
| D67      | Cl              |                 | 26           | 41              | 101 | 106 | 105  | 84   | 105 | 155 |
| D68      | F               |                 | 33           | 52              | 121 | 137 | 121  | 84   | 109 | 127 |

**Supplementary Table 6.** Further investigation of NAMs

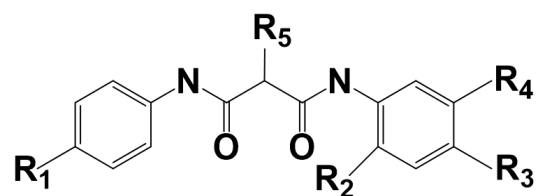

| Compound |                                 |                 |                 |    |       | % Production |                  |     |     |      |      |     |     |
|----------|---------------------------------|-----------------|-----------------|----|-------|--------------|------------------|-----|-----|------|------|-----|-----|
| Name     | R1                              | R2              | R3              | R4 | R5    | Pyocyanin    | <i>pqsA</i> -GFP | HHQ | PQS | HQNO | 2-AA | DHQ | AA  |
| D92      | C <sub>6</sub> H <sub>6</sub> O | NH <sub>2</sub> | CN              |    |       | 4            | 1                | -   | -   | -    | -    | -   | -   |
| D98      | C <sub>6</sub> H <sub>6</sub> O |                 | CF <sub>3</sub> |    |       | 42           | 29               | -   | -   | -    | -    | -   | -   |
| D70      | CN                              |                 | Me              |    |       | 50           | -                | -   | -   | -    | -    | -   | -   |
| D71      | CN                              |                 |                 | Cl |       | 13           | 10               | 106 | 105 | 127  | 57   | 92  | 207 |
| D72      | CN                              |                 |                 | F  |       | 30           | -                | -   | -   | -    | -    | -   | -   |
| D75      | CN                              |                 |                 | CN |       | 49           | -                | -   | -   | -    | -    | -   | -   |
| D95      | CN                              |                 | CN              | Cl |       | 4            | 6                | 5   | 10  | 30   | 11   | 13  | 774 |
| D80      | CN                              |                 | CN              |    | Me    | 7            | 10               | 8   | 20  | 64   | 16   | 20  | 832 |
| D88      | C <sub>6</sub> H <sub>6</sub> O |                 | CN              |    | F     | 6            | 2                | 1   | 4   | 14   | 7    | 7   | 832 |
| D96      | CN                              |                 | CN              |    | F     | 34           | 42               | -   | -   | -    | -    | -   | -   |
| D100     | C <sub>6</sub> H <sub>6</sub> O |                 | CF <sub>3</sub> |    | F     | 7            | 2                | -   | -   | -    | -    | -   | -   |
| D94      | CN                              |                 | CN              |    | Me, F | 52           | 85               | -   | -   | -    | -    | -   | -   |
| D97      | CN                              |                 | CN              |    | F, F  | 94           | 95               | -   | -   | -    | -    | -   | -   |



**Supplementary Table 7.** NAMs analogs bearing Pyridine motif replacing one or two Aryl groups

| Compound |                                                                                   | % Production |                  |     |     |      |      |     |     |
|----------|-----------------------------------------------------------------------------------|--------------|------------------|-----|-----|------|------|-----|-----|
| Name     |                                                                                   | Pyocyanin    | <i>pqsA</i> -GFP | HHQ | PQS | HQNO | 2-AA | DHQ | AA  |
| D77      | 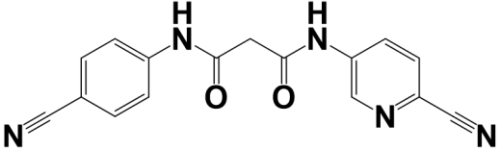 | 7            | 1                | 10  | 24  | 64   | 19   | 20  | 777 |
| D78      |  | 14           | -                | -   | -   | -    | -    | -   | -   |
| D91      |  | 43           | 39               | -   | -   | -    | -    | -   | -   |

**Supplementary Table 8. Solubility assessment of NAMs in PBS.** Solubility of the 10mM compounds dissolved in DMSO was tested in the isotonic phosphate buffer (iPBS) at pH 7.4 using High-Performance Liquid Chromatography (HPLC). The solubility of each compound is expressed by the ratio of compound amount in the sample test solution to the amount of compound in the standard solution.

| <b>Compound</b> | <b>Solubility (<math>\mu</math>M) in PBS</b> |
|-----------------|----------------------------------------------|
| D41             | 13                                           |
| D42             | 15                                           |
| D43             | 11                                           |
| D57             | 7                                            |
| D69             | 21                                           |
| D77             | 39                                           |
| D80             | 29                                           |
| D88             | 490                                          |
| D95             | 17                                           |
| D100            | 5                                            |

**Supplementary Table 9. Antibiotic-resistance profile of *P. aeruginosa* clinical isolates**

| Antibiotic Resistance Profile |       |       |       |      |        |       |      |      |
|-------------------------------|-------|-------|-------|------|--------|-------|------|------|
| Strain No.                    | Amik. | Gent. | Mero. | Pip. | Tobra. | Cefe. | Aze. | Cip. |
| LGR-4325                      | R     | R     | R     | R    | S      | R     | R    | R    |
| LGR-4326                      | R     | R     | R     | S    | S      | S     | S    | R    |
| LGR-4327                      | R     | R     | R     | R    | I      | R     | R    | R    |
| LGR-4328                      | S     | S     | S     | S    | S      | S     | S    | S    |
| LGR-4330                      | S     | S     | R     | S    | S      | S     | S    | R    |
| LGR-4331                      | S     | S     | S     | S    | S      | S     | S    | S    |
| LGR-4333                      | R     | R     | R     | R    | R      | R     | R    | R    |
| LGR-4334                      | R     | R     | S     | R    | R      | S     | S    | S    |
| LGR-4340                      | S     | S     | S     | S    | S      | S     | S    | S    |
| LGR-4343                      | R     | R     | R     | R    | R      | R     | S    | S    |
| LGR-4344                      | R     | R     | I     | R    | R      | R     | R    | S    |
| LGR-4348                      | S     | R     | R     | R    | R      | I     | S    | R    |
| LGR-4356                      | R     | R     | R     | R    | R      | R     | R    | R    |
| LGR-4362                      | R     | R     | R     | R    | R      | R     | R    | S    |
| LGR-4363                      | R     | R     | I     | R    | R      | R     | I    | S    |
| LGR-4364                      | R     | R     | R     | R    | R      | R     | I    | S    |
| LGR-4366                      | S     | R     | R     | R    | R      | R     | R    | R    |
| LGR-4368                      | S     | S     | S     | S    | S      | S     | S    | S    |

Amik. = Amikacin, Gent. = Gentamycin, Mero. = Meropenem, Pip. = Piperacin, Tobra. = Tobramycin, Cefe. = Cefepime, Aze. = Azetromycin, Cip. = Ciprofloxacin.

R = Resistant; I = intermediate; S = sensitive.

a

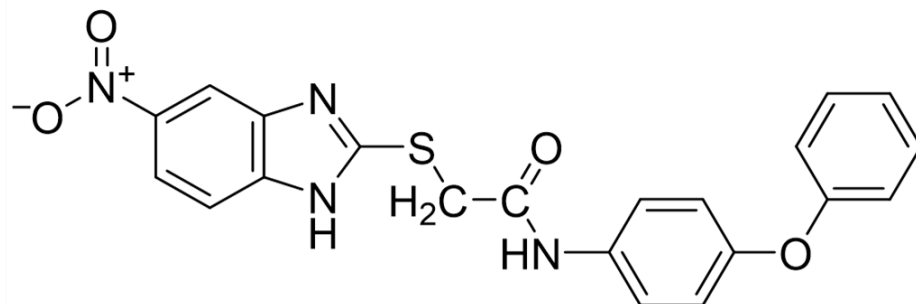

b

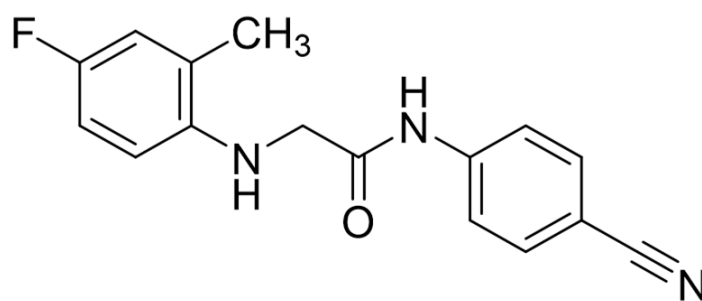

Supplementary Figure 1. Chemical structure of (a) M64 and (b) M17

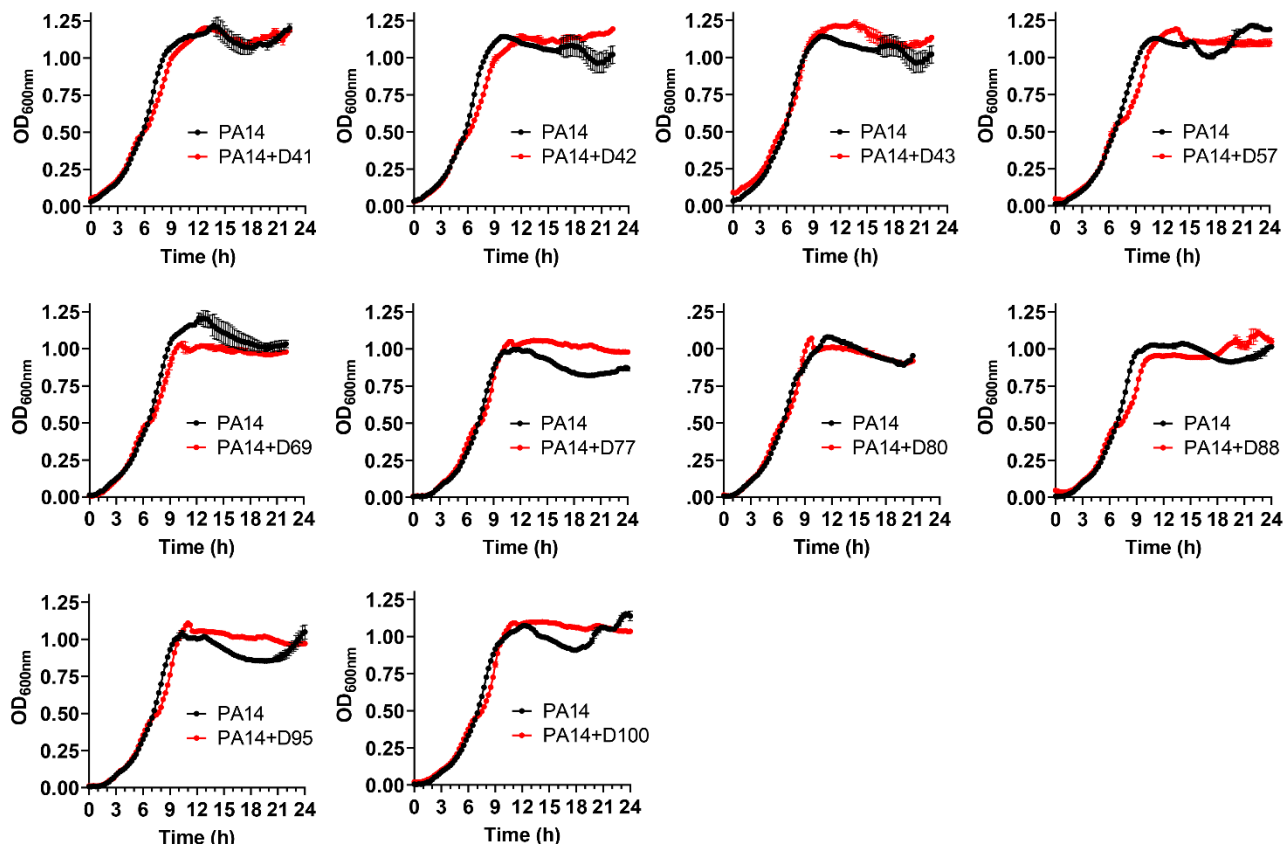

**Supplementary Figure 2: NAMs do not affect the growth of the *P. aeruginosa* PA14.** The growth curve of PA14 was determined with or without a compound. Cells were grown in 96-well microtiter plates in Tecan F200 microplate reader at 37°C for 24h in the presence of 50  $\mu$ M of the compounds (red) or vehicle (black), and optical density (OD) was measured at 600<sub>nm</sub> every 15minute up to 24hr. Data represent n=2-3, The error bars denote  $\pm$  SEM. Source data having exact replicate are provided in a Source Data file.

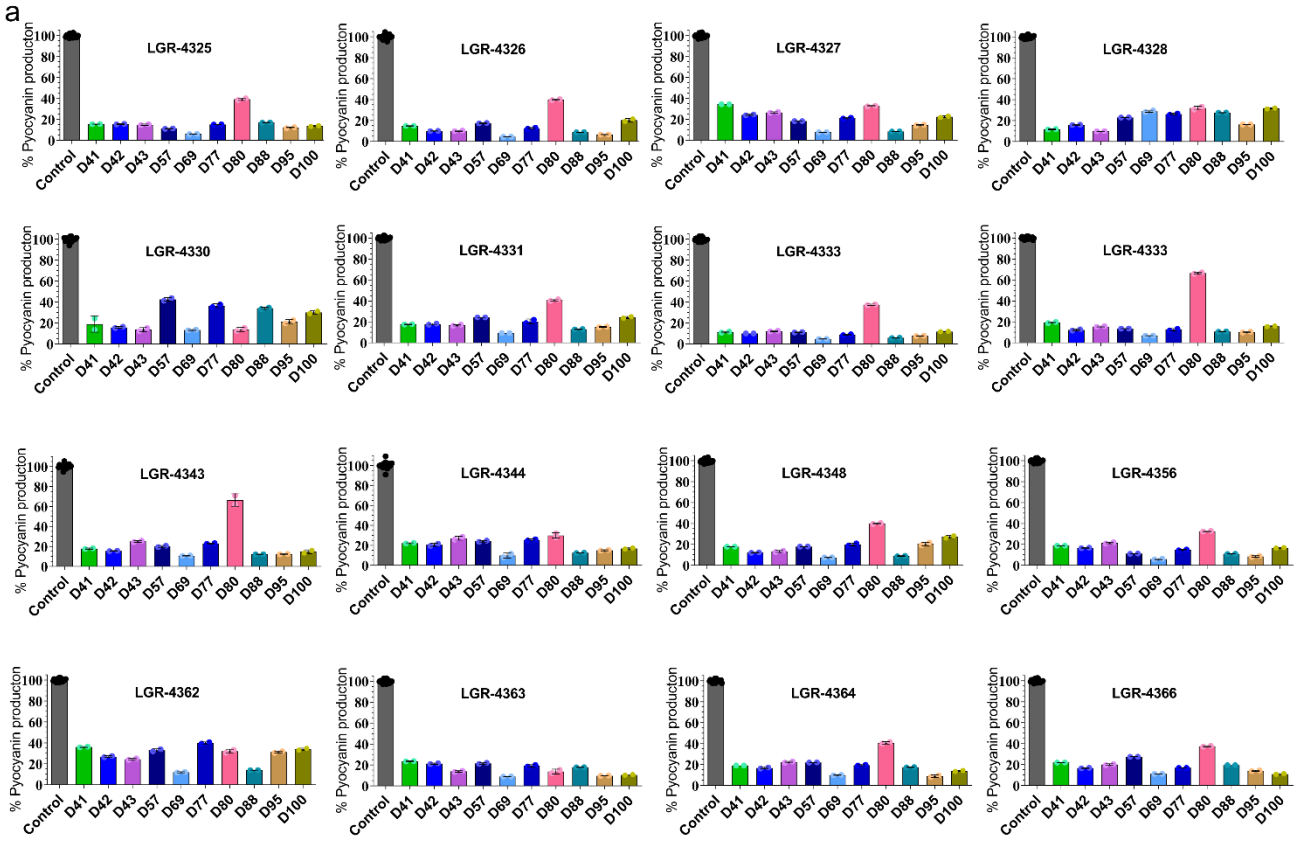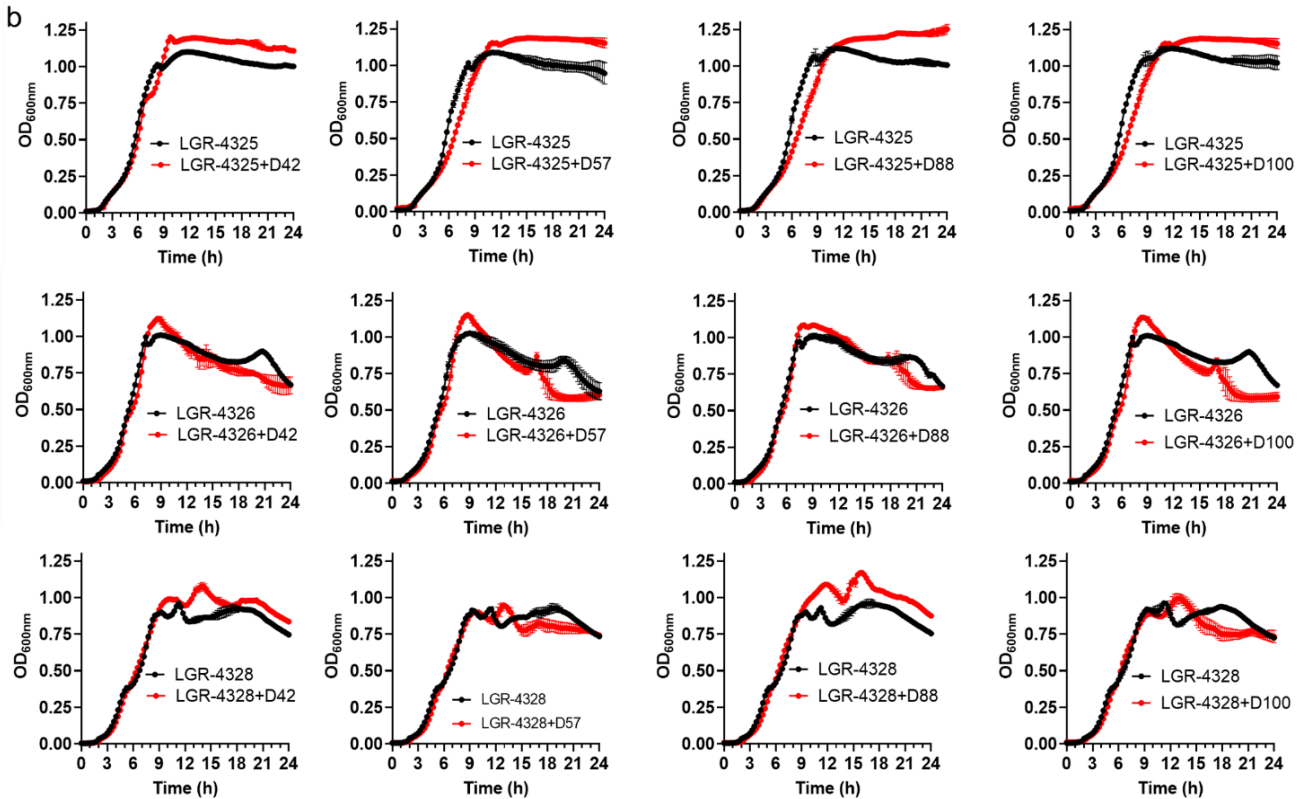

**Supplementary Figure 3. NAMs are highly efficacious against pyocyanin production in multi-drug resistant clinical strains of *P. aeruginosa*.** **a.** Pyocyanin production was measured in 16 *P. aeruginosa* clinical isolates 18hr post-growth in the presence or absence of 10  $\mu$ M of each NAM compound. The percent of pyocyanin production was calculated by comparing the same strain grown in the presence of the vehicle control. **b.** Representative growth curves in the presence or absence of 50 $\mu$ M of NAM compounds. Cells were grown in 96-well microtiter plates in Tecan F200 microplate reader at 37°C for 24h in the presence of 50  $\mu$ M of the compounds (red) or vehicle (black), and optical density (OD) was measured at 600<sub>nm</sub> every 15minute up to 24hr. **a-b** Data represent n=2-3, the error bars denote  $\pm$  SEM. Source data having exact replicate are provided in a Source Data file.

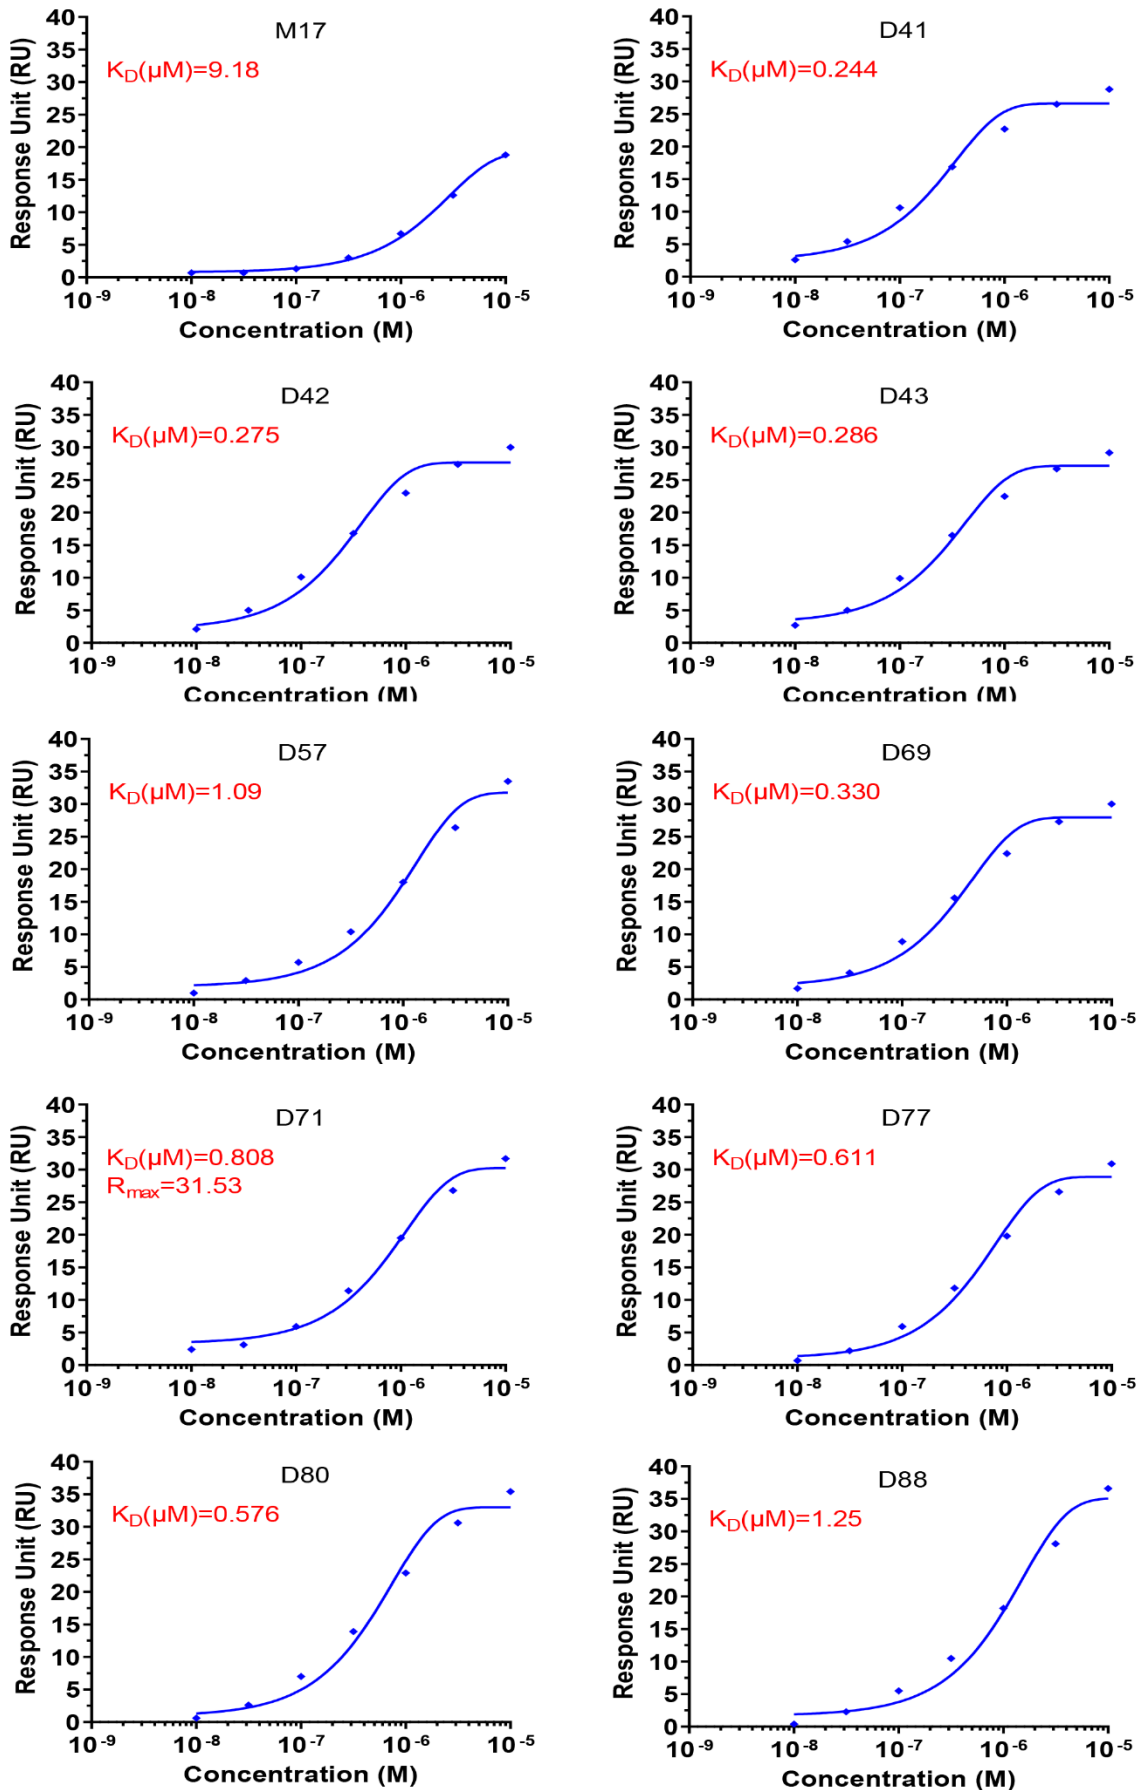

**Supplementary Figure 4. Binding kinetics profile of NAMs to the MvfR protein. The binding of the compounds was assessed using Surface Plasmon Resonance (SPR).**



### MvfR-D88 docking result

| Form# | Score<br>(Binding energy)<br>[ kcal/mol ] |
|-------|-------------------------------------------|
| 1     | -10.857                                   |
| 2     | -9.605                                    |
| 3     | -9.494                                    |
| 4     | -9.239                                    |

Docking form 1

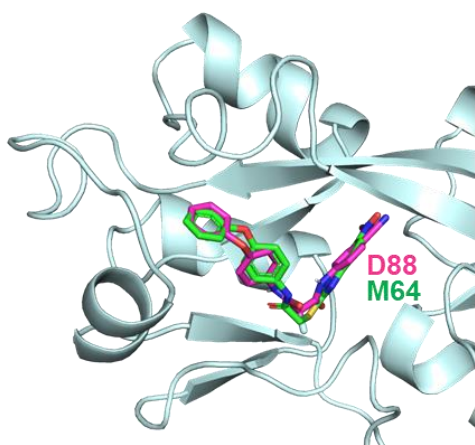

Docking form 2

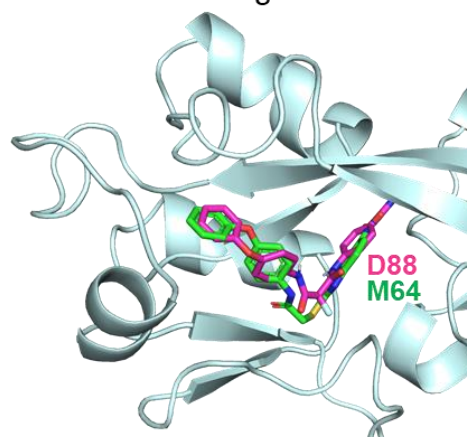

Docking form 3

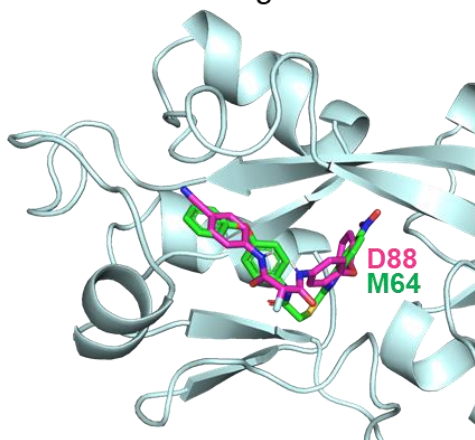

Docking form 4

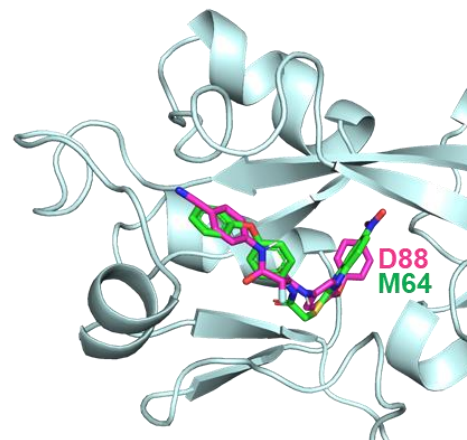

**Supplementary Figure 5. Results of MvfR-D88 docking analysis using AutoDock Vina.** Docking forms of D88 were superimposed with the crystal structure of MvfR-LBD in a complex with M64 (PDB ID: 6B8A). D88 and M64 were indicated with magenta and green sticks, respectively.

### MvfR-M64 docking result

| Form # | Score<br>(Binding energy)<br>[ kcal/mol ] |
|--------|-------------------------------------------|
| 1      | -9.858                                    |
| 2      | -9.829                                    |
| 3      | -9.304                                    |
| 4      | -9.275                                    |

Docking form 1

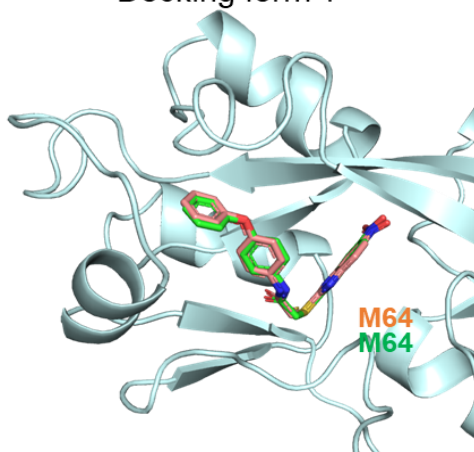

Docking form 2

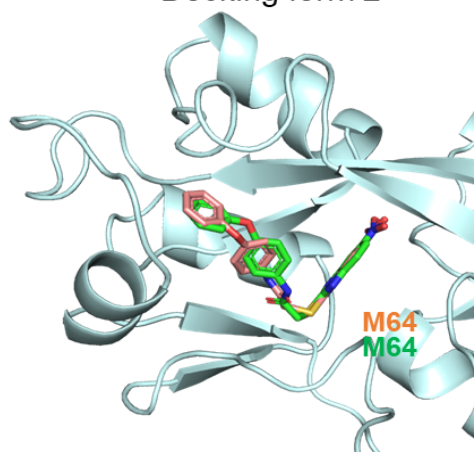

Docking form 3

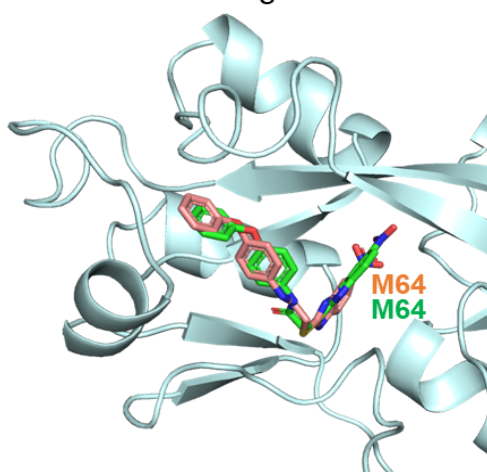

Docking form 4

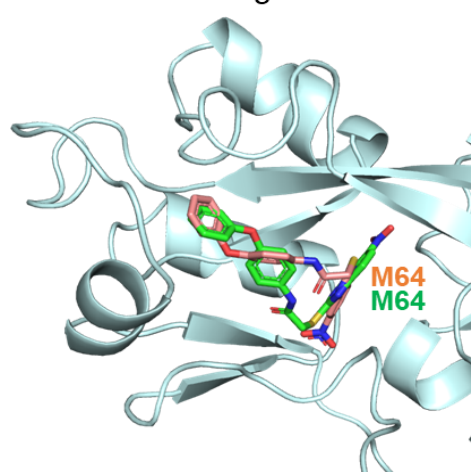

**Supplementary Figure 6. Results of cross-docking analysis using M64.** M64 was used for cross-docking validation. Docking forms of M64 were superimposed with the crystal structure of MvfR-LBD in a complex with M64 (PDB ID: 6B8A). Docked M64 and M64 observed in the crystal structure were indicated with orange and green sticks, respectively. In the docking form 1 with the highest score, M64 was docked at approximately the same position as M64 in the crystal structure.

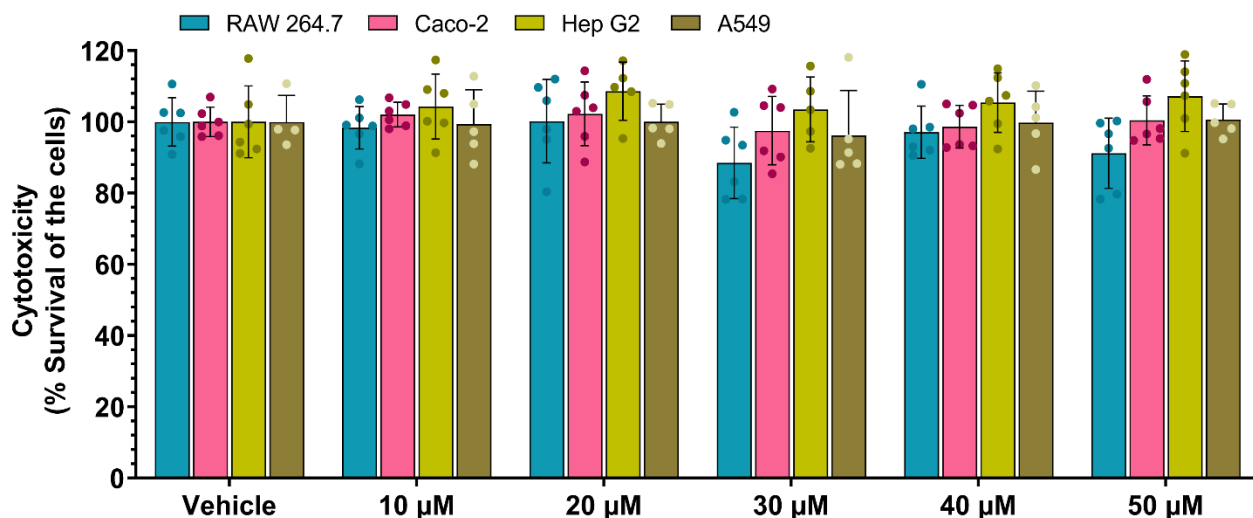

**Supplementary Figure 7. Cytotoxicity assessments of the compound D88.** Cell viability was assessed in four different cell types, RAW 264.7 (macrophage), Caco-2 (colon epithelial cells), Hep G2 (liver cells), and A549 (lung epithelial cells), the presence and absence of D88 at different compound concentrations (10, 20, 30, 40, and 50 $\mu$ M). None of the used compound concentrations exerted any cytotoxic effect in the tested cell lines. The cells' percent survival was calculated compared to the same cell type grown in the presence of vehicle control. Data represent at least n=4, each dot on the graph represents one biological replicate. The number of biological replicates used for each cell line and D88 concentration is depicted on the bar. The error bars denote  $\pm$  SEM. Source data having exact n replicate is provided in a Source Data file.

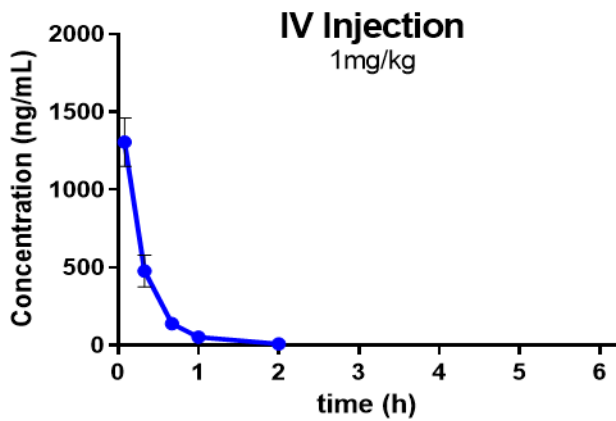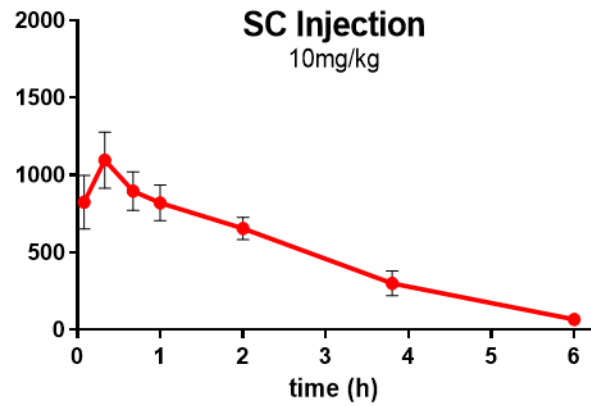

| Matrix | $T_{1/2}$ (h) | $T_{max}$ (h) | $T_{last}$ (h) | $C_{max}$ (ng/mL) | $C_{last}$ (ng/mL) | $AUC_{0-t}$ (h*ng/mL) |
|--------|---------------|---------------|----------------|-------------------|--------------------|-----------------------|
| IV     | 0.27          | 0.080         | 2              | 1086              | 14.2               | 494                   |
| SC     | 1.25          | 0.33          | 6              | 1096              | 66.6               | 2892                  |

**Supplementary Figure 8. Pharmacokinetics of D88 *in vivo*.** D88 was administered via intratracheal instillation 10.2 mg/Kg in homogeneous suspension (0.5 % HPMC in water and assessed at different time points up to 6h. Data represent mean value of n=4 biological replicates, and the error bars denote  $\pm$  SEM. Source data having exact replicate are provided in a Source Data file.

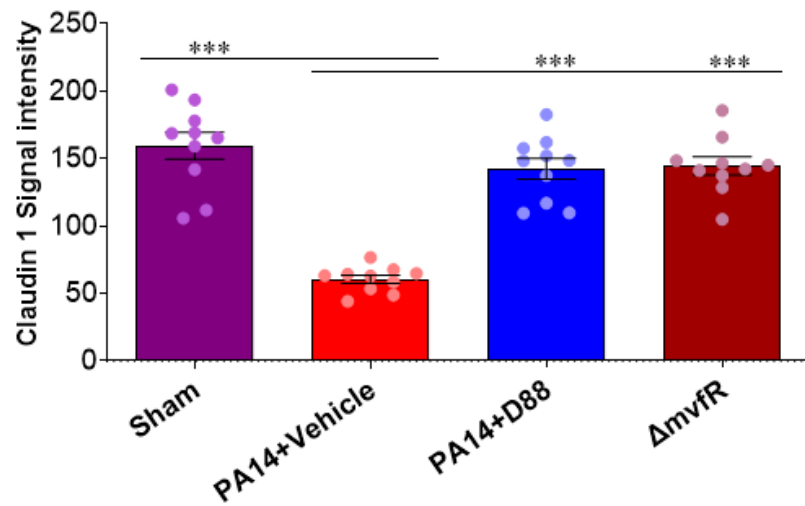

**Supplementary Figure 9. Quantification of the respective confocal images.** The signal intensity of claudin 1 in the PA14 infected + vehicle control group was compared to the groups of infected and D88-treated,  $\Delta mvfR$ -infected, and sham (vehicle-treated only). Each dot represents signal intensity at different area of the image 7a obtained from n=1 for each group. Images obtained from the additional biological replicates n=2 had similar results. The error bars denote  $\pm$  SEM. One-way ANOVA followed by Tukey post-test was applied. \*\*\* indicate significant differences compared to the no treatment control at  $P < 0.001$ .

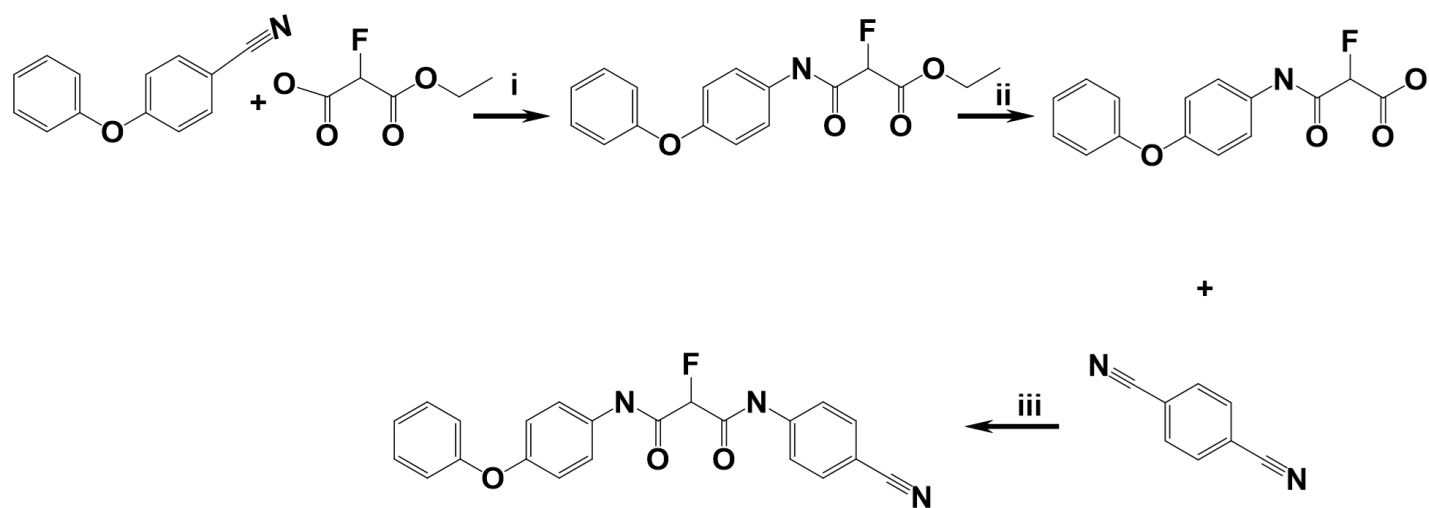

**D88**

Supplementary Figure 10. Route of synthesis for compound D88.

**Supplementary Figure 11. Analytical data of non-commercially available compounds. a-h**  $^1\text{H}$  NMR and Mass spectrometry spectra shown for compounds, **a.** D47, **b.** D56, **c.** D59, **d.** D61, **e.** D62, **f.** D63, **g.** D64, **h.** D88. DMSO was used as a solvent. All compounds were synthesized by Enamine Ltd., Kyiv, Ukraine. Certificate of analysis reports compounds' purity ~ 95%.

**a1**

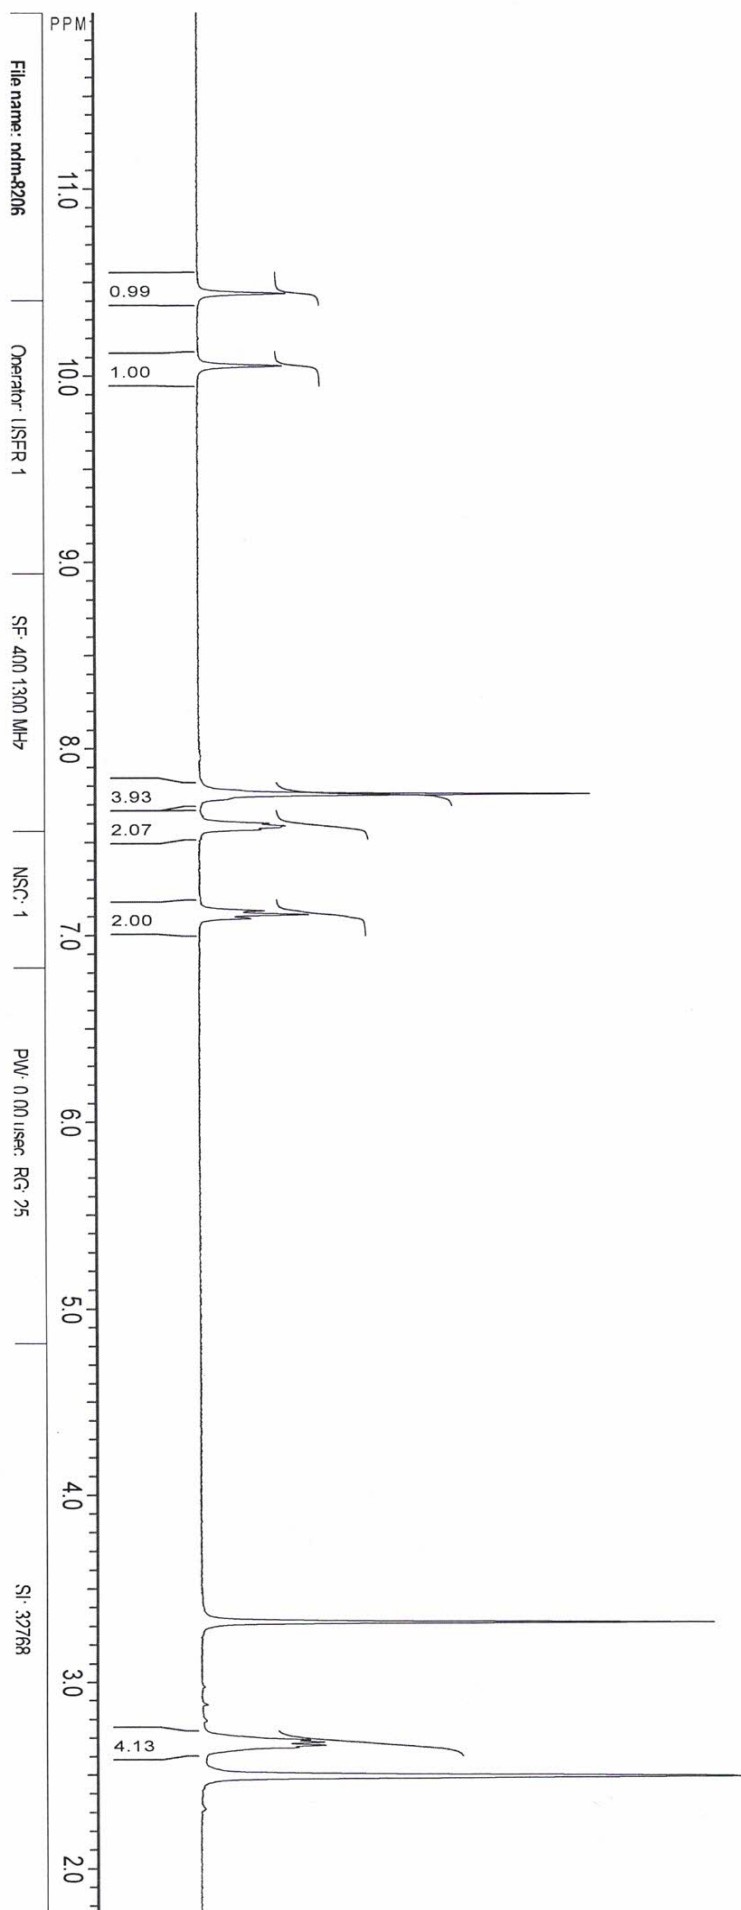

pdm-8206

D47

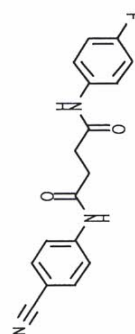

# PDM-8206

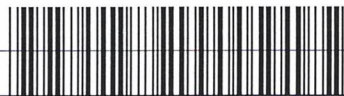

axPeak: 100.00%  
et\_Time: 1.117 min

DAD1 A, Sig=215,10 Ref=off (D:\D\01\_11\L031411D\SAMPL006.D)

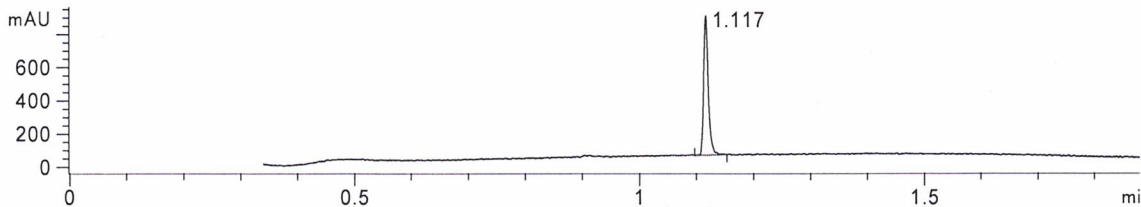

DAD1 B, Sig=254,10 Ref=off (D:\D\01\_11\L031411D\SAMPL006.D)

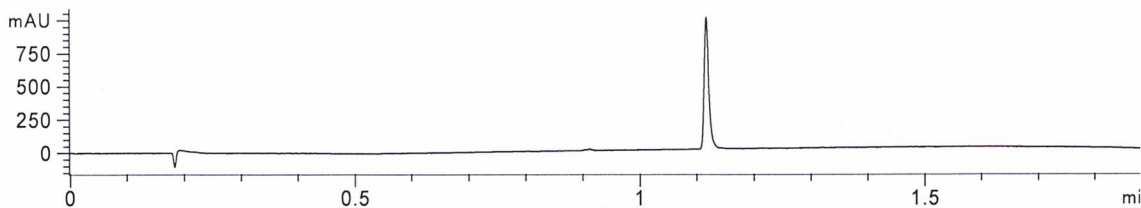

Mol Wt  
Exact Mass

| Time  | Area%  |
|-------|--------|
| 1.117 | 100.00 |

MSD1 TIC, MS File (D:\D\01\_11\L031411D\SAMPL006.D) API-ES, Scan, Frag: 120, "Pos"

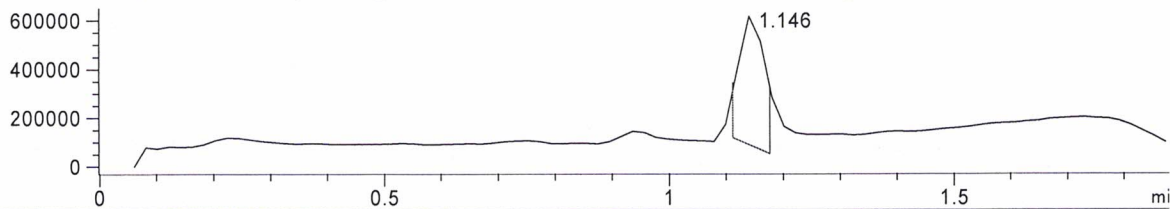

MSD2 TIC, MS File (D:\D\01\_11\L031411D\SAMPL006.D) , Scan, Frag: 120, "Neg"

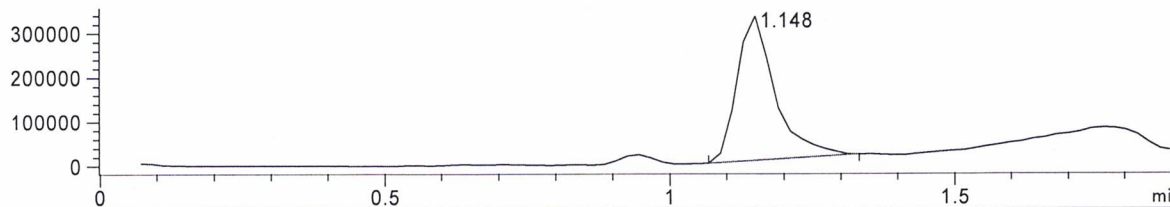

ADC1 A, ELSD (D:\D\01\_11\L031411D\SAMPL006.D)

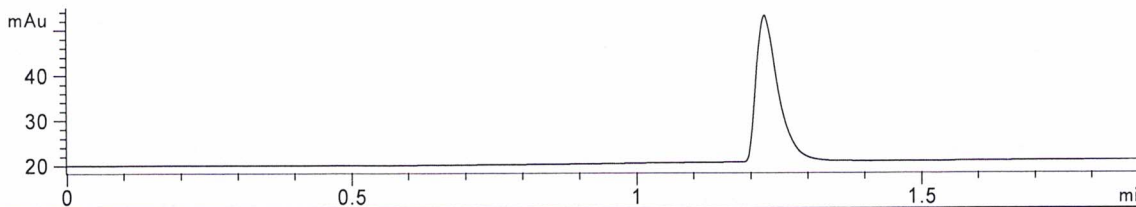

\*MSD1 SPC, time=1.140 of D:\D\01\_11\L031411D\SAMPL006.D API-ES, Scan, Frag: 120, "Pos"

RT 1.146

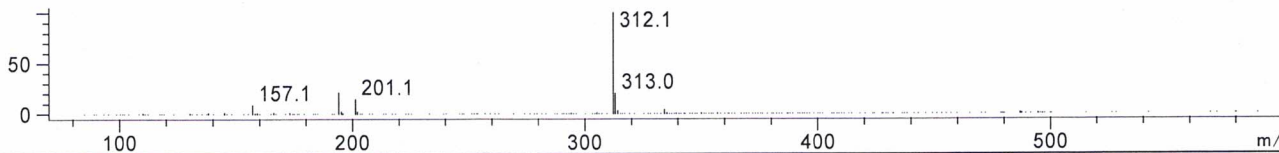

\*MSD2 SPC, time=1.150 of D:\D\01\_11\L031411D\SAMPL006.D , Scan, Frag: 120, "Neg"

RT 1.148

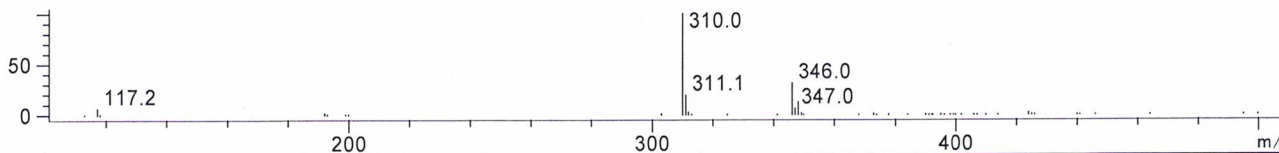



pdm-9553

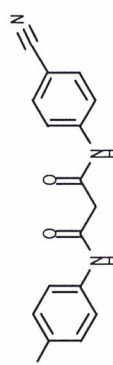

D56

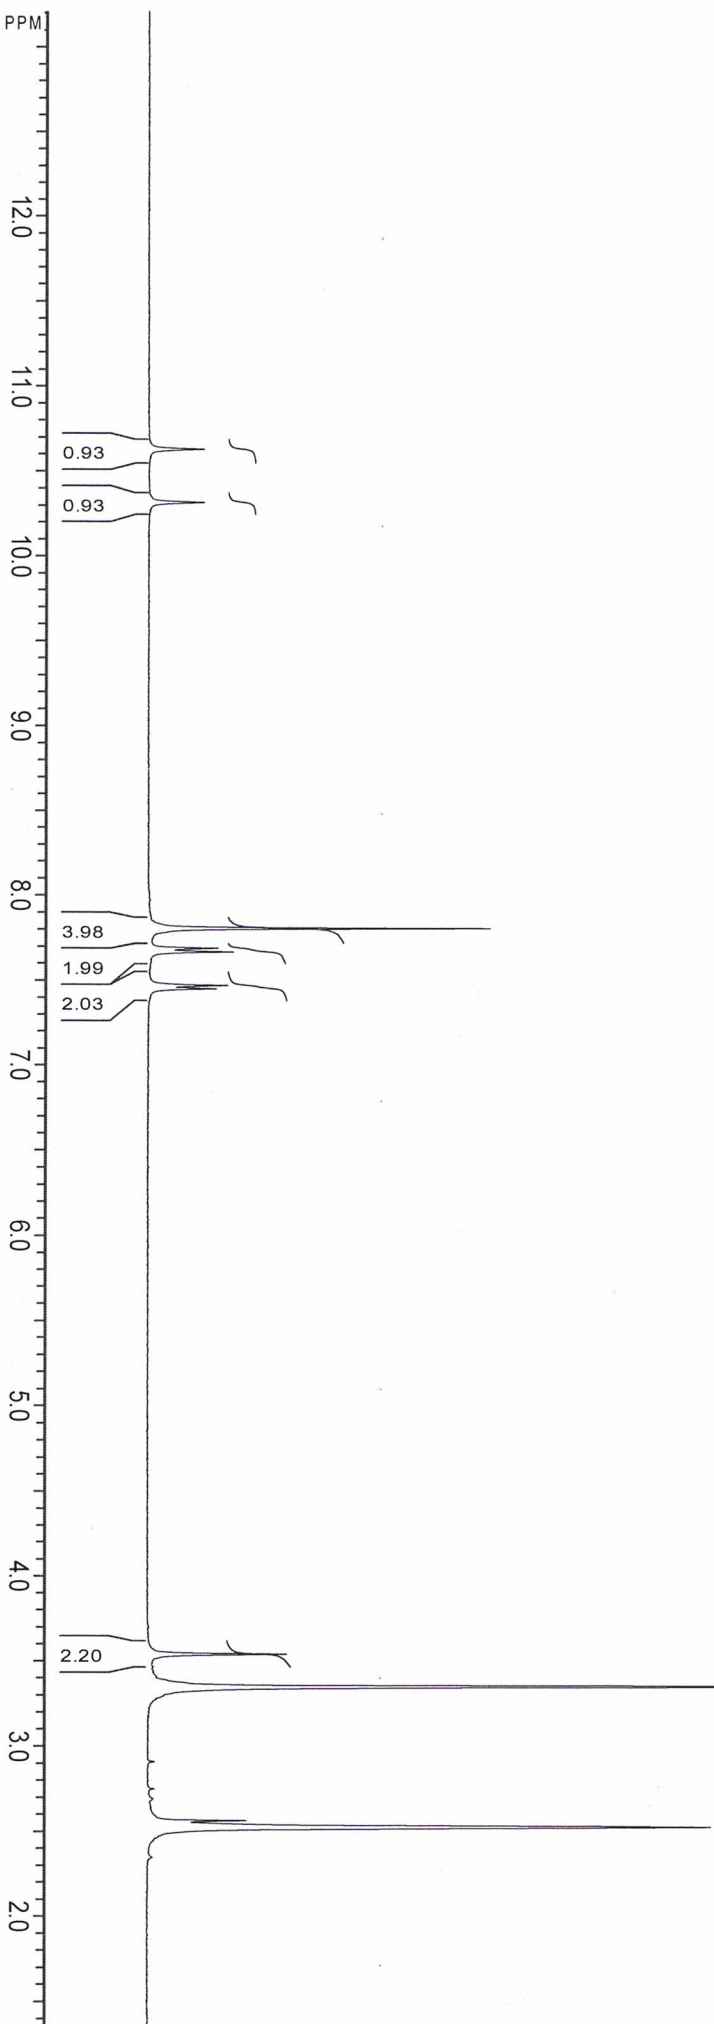

|                     |                  |                  |           |                            |        |
|---------------------|------------------|------------------|-----------|----------------------------|--------|
| File name: pdm-9553 | Operator: USER 1 | SF: 400.1300 MHz | NSC: 1    | PW: 0.00 usec, RG: 25      | SI: 32 |
| Date: 08-Aug-2017   | Solvent: DMSO    | SW: 8224 Hz      | TE: 298 K | AQ: 1.99 sec, RD: 0.00 sec |        |

b1

b2

MaxPeak: 100.00%  
Ret\_Time: 1.385 min

# PDM-9553

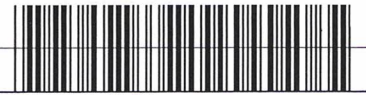

| Mol Wt     | 0      |
|------------|--------|
| Exact Mass |        |
| Time       | Area%  |
| 1.385      | 100.00 |

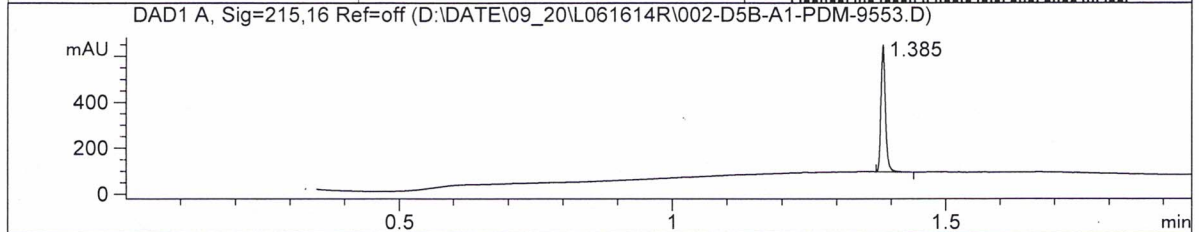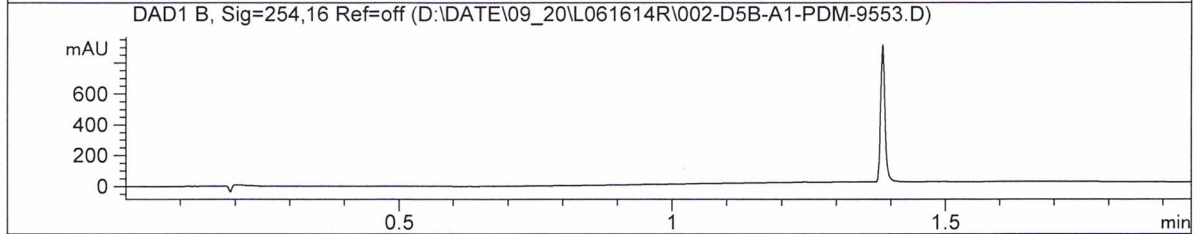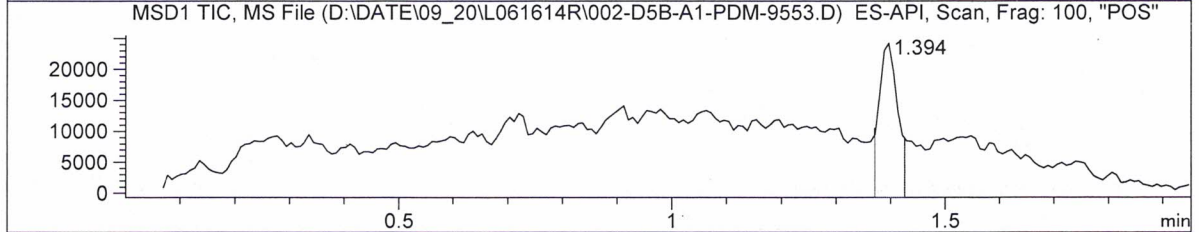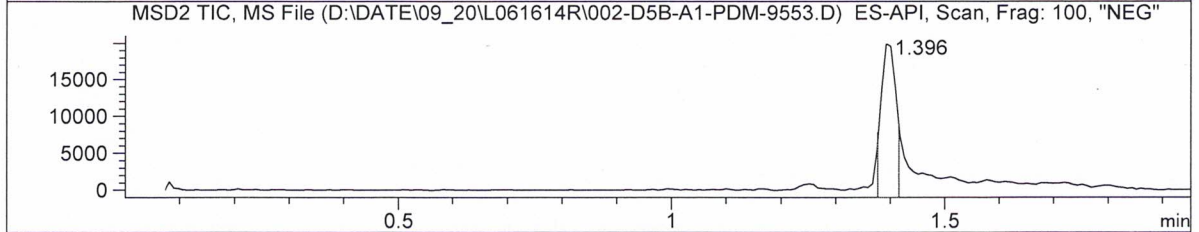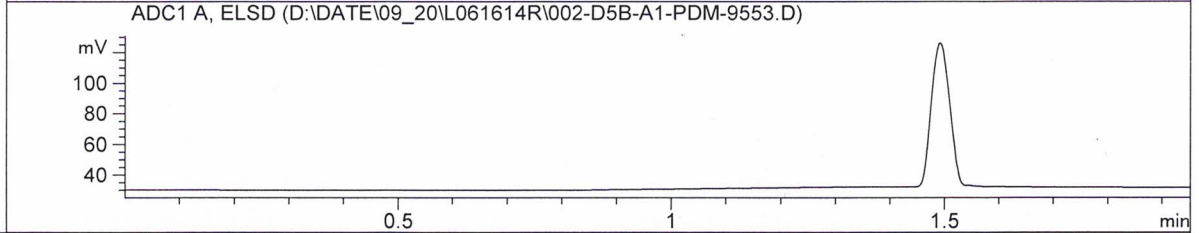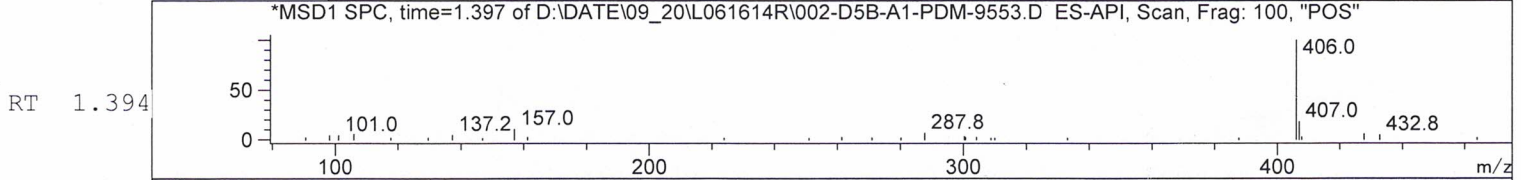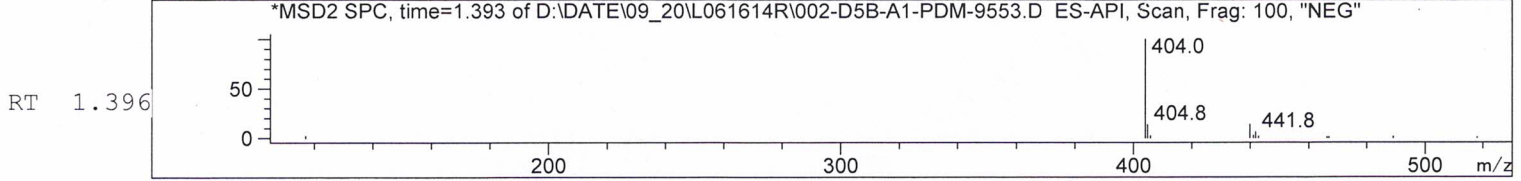

c1

pdm9754.fid

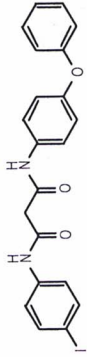

D59

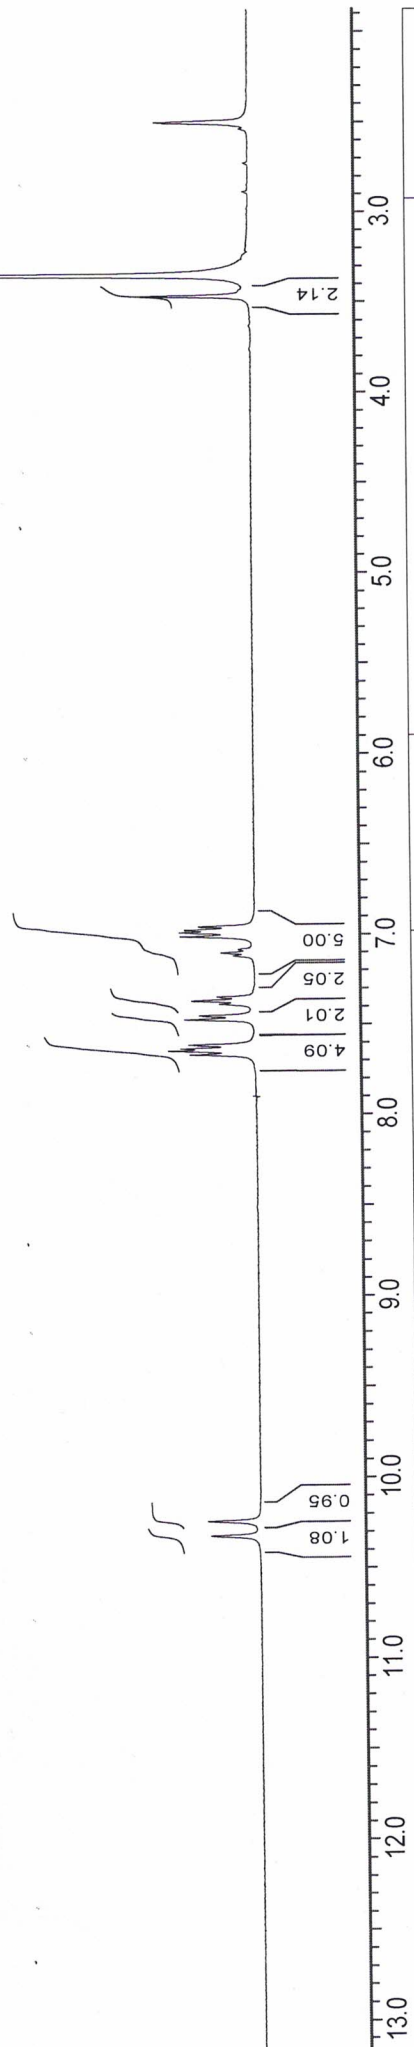

|                        |                  |                  |           |                            |           |
|------------------------|------------------|------------------|-----------|----------------------------|-----------|
| File name: pdm9754.fid | Operator:        | SF: 399.9831 MHz | NSC: 0    | PW: 7.50 usec, RG: 30      | SI: 16384 |
| Date: 26-Sep-2017      | Solvent: dmso_d6 | SW: 7639 Hz      | TE: 293 K | AC: 1.05 sec, RD: 0.00 sec |           |

c2

MaxPeak: 100.00%  
Ret\_Time: 1.579 min

# PDM-9754

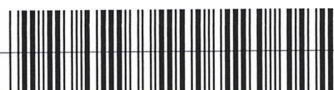

Mol Wt  
Exact Mass

0

| Time  | Area%  |
|-------|--------|
| 1.579 | 100.00 |

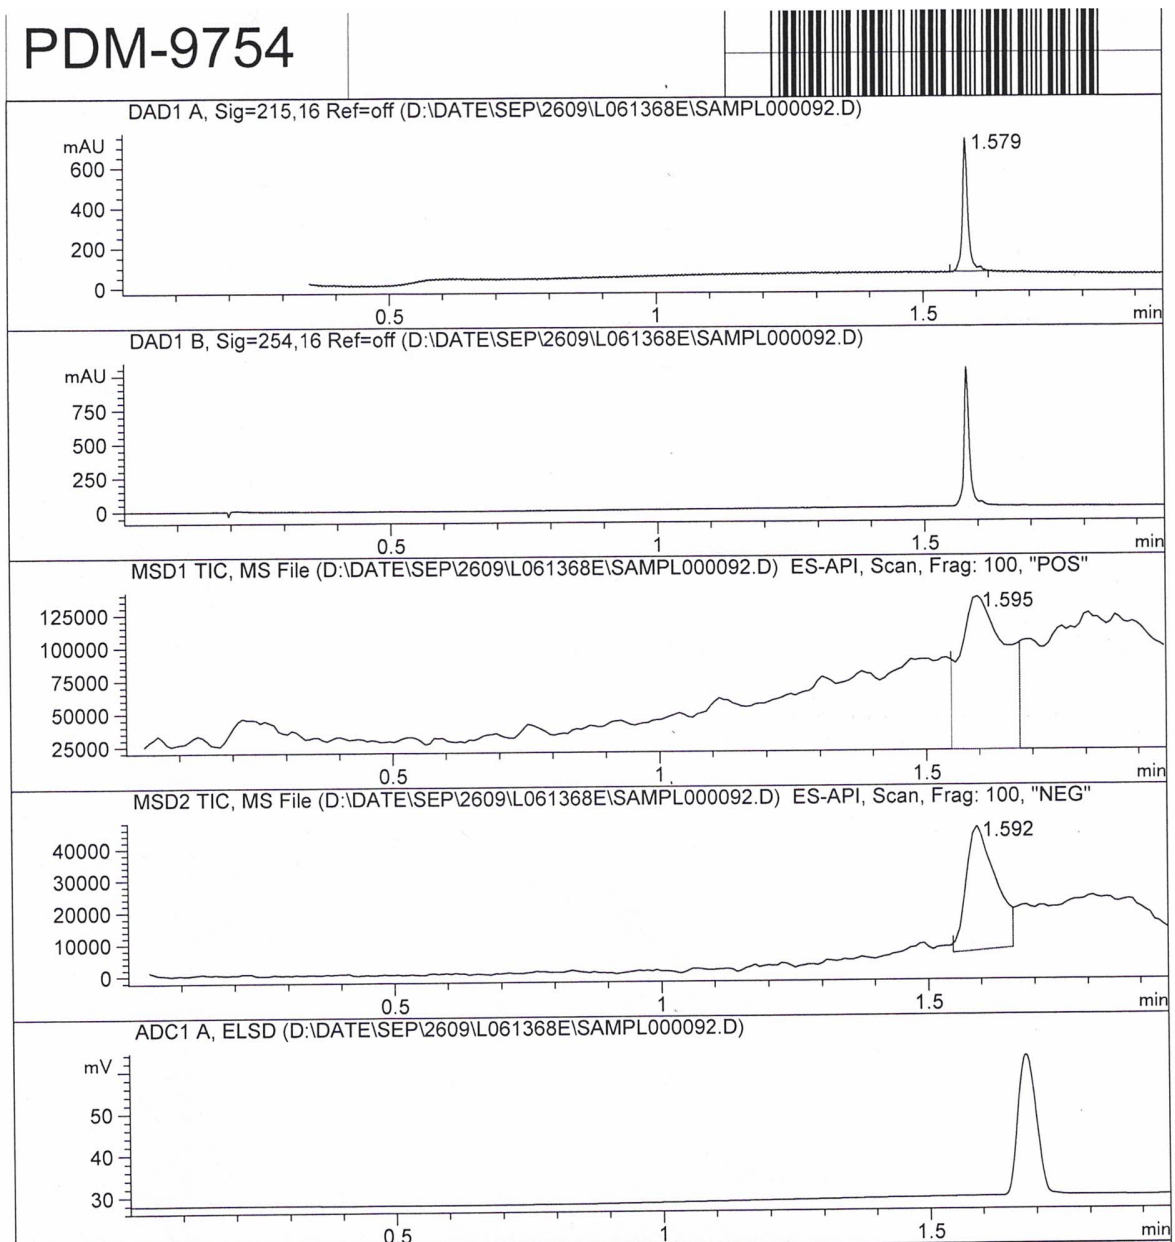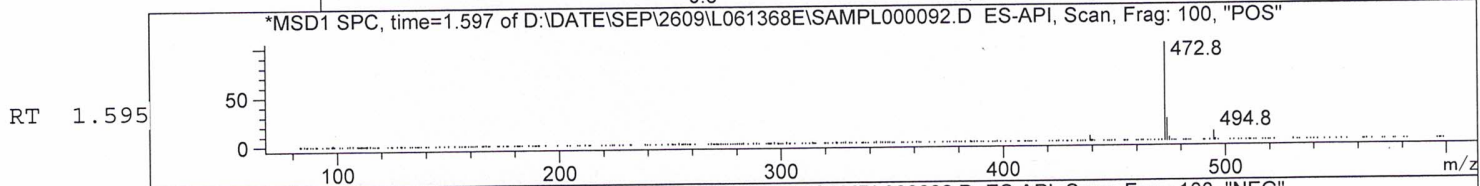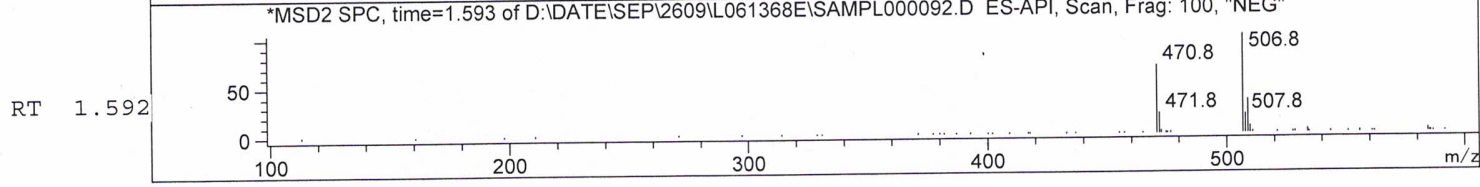

d1

pdm9756.fid

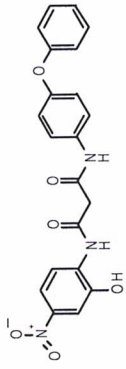

D61

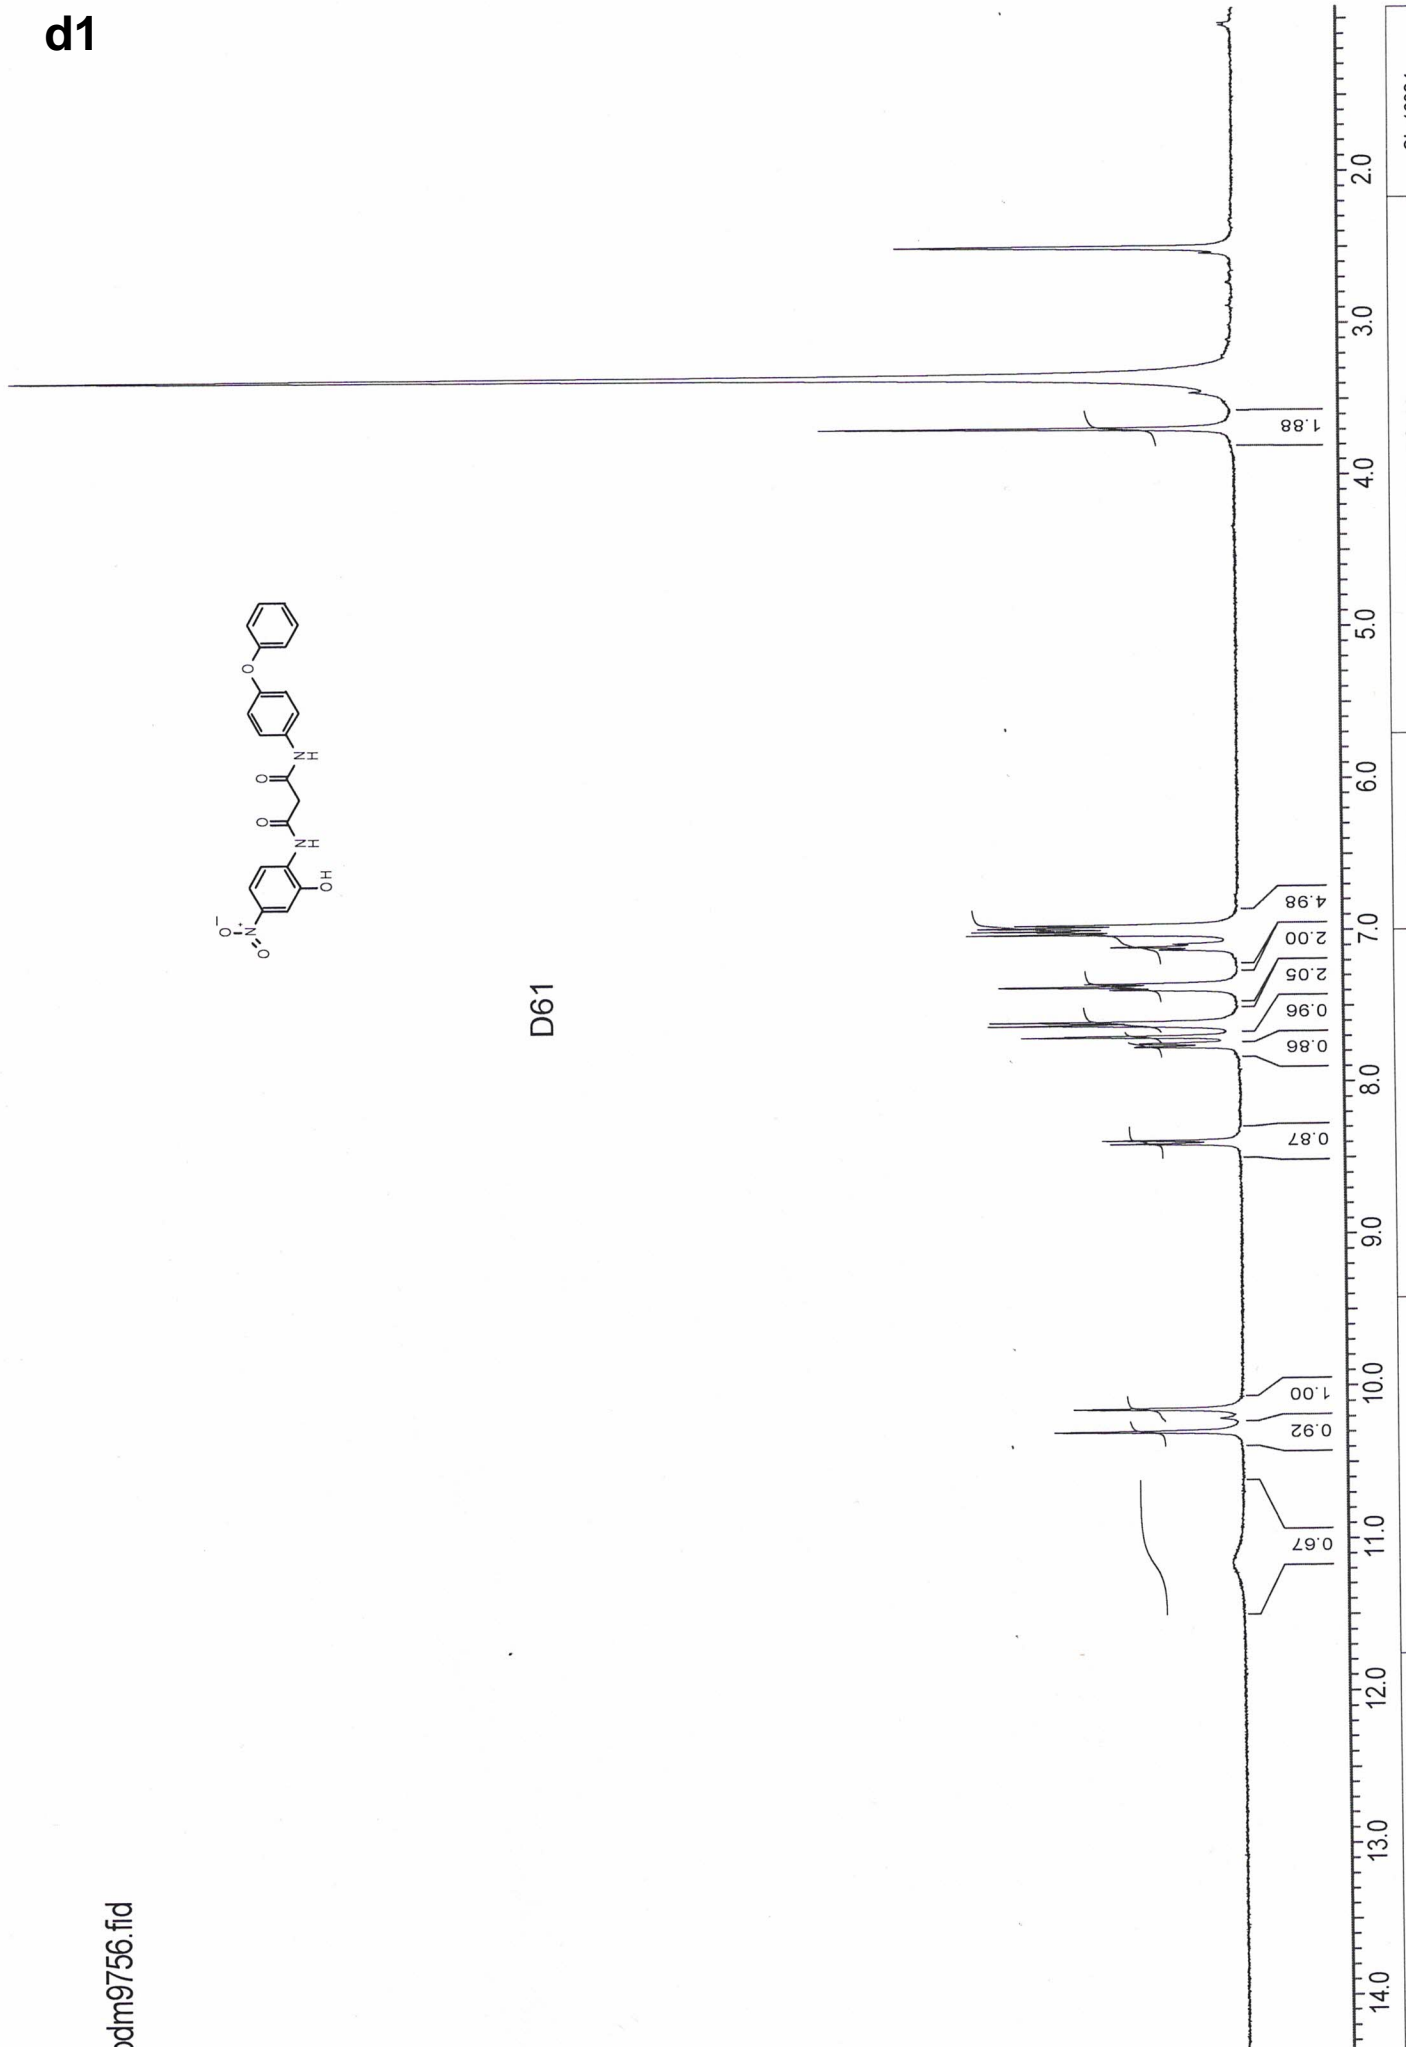

|                        |                  |                  |           |                            |           |
|------------------------|------------------|------------------|-----------|----------------------------|-----------|
| File name: pdm9756.fid | Operator:        | SF: 399.9831 MHz | NSC: 0    | PW: 7.50 usec, RG: 30      | SI: 16384 |
| Date: 26-Sep-2017      | Solvent: dmso-d6 | SW: 7637 Hz      | TE: 293 K | AQ: 1.05 sec, RD: 0.00 sec |           |

d2

MaxPeak: 95.01%  
Ret\_Time: 1.451 min

# PDM-9756

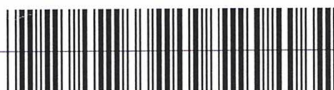

Mol Wt

0

Exact Mass

| Time  | Area% |
|-------|-------|
| 1.451 | 95.01 |
| 1.611 | 4.99  |

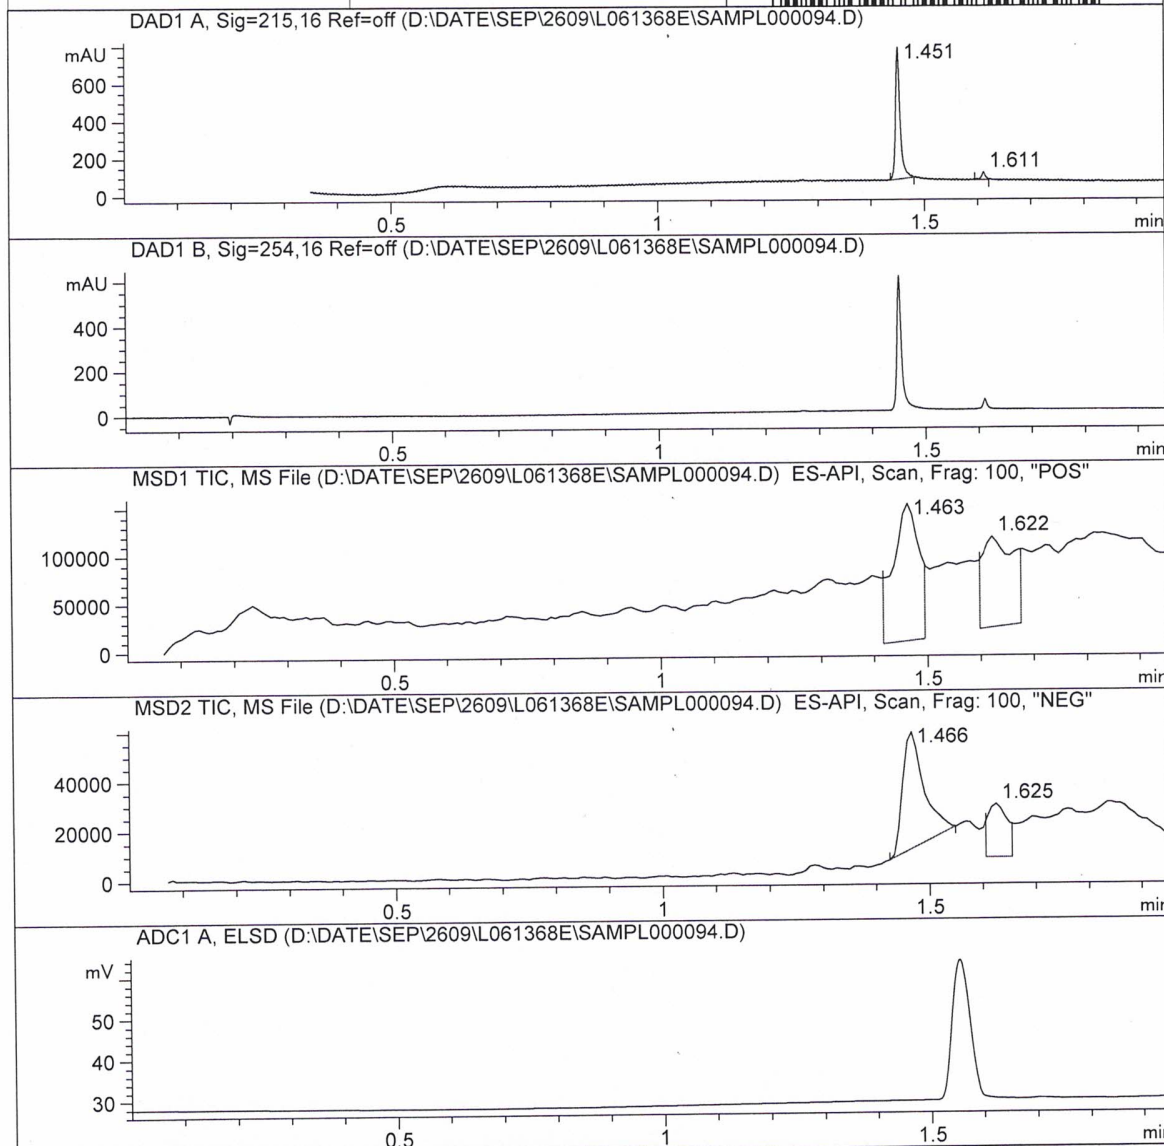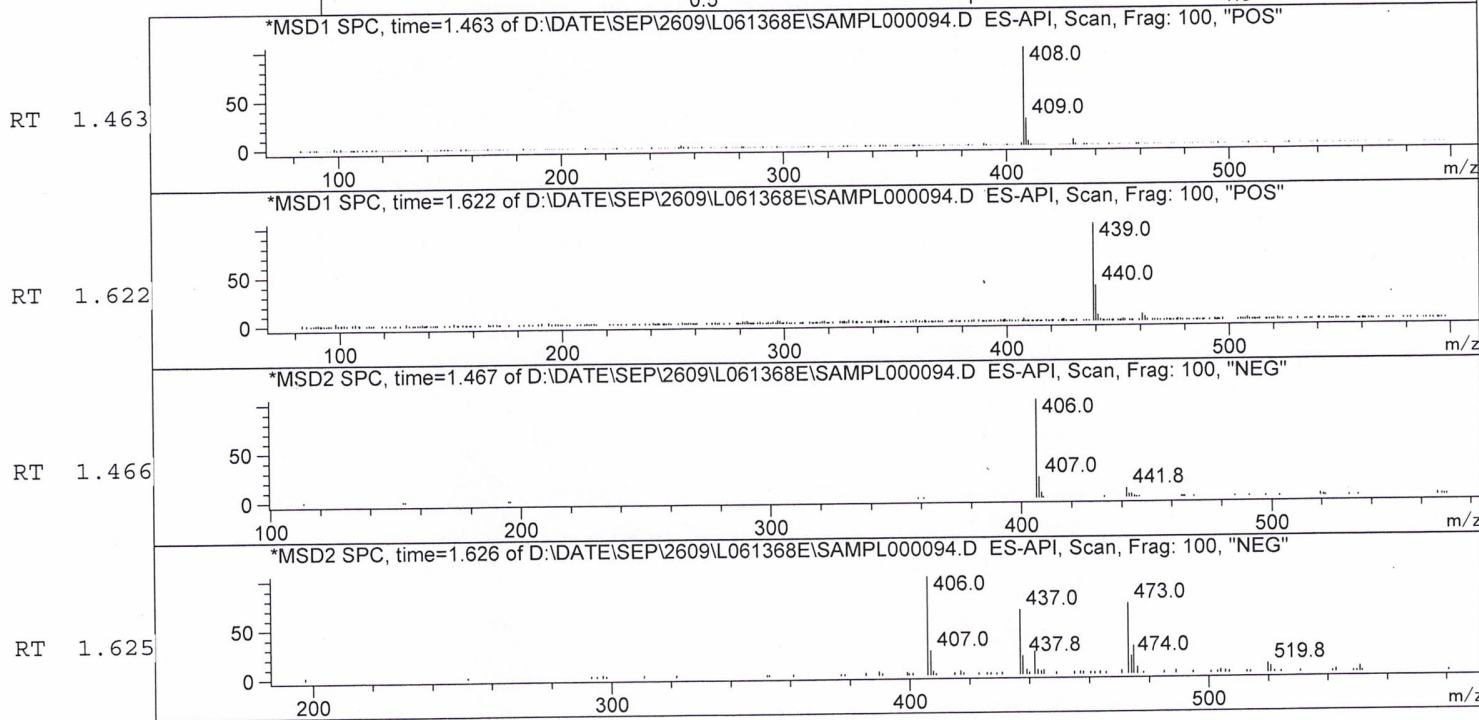

e1

P1LVUM~Y.FID

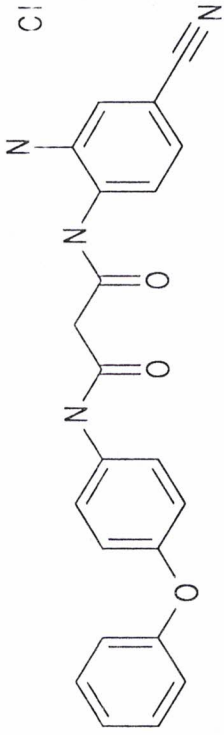

D62

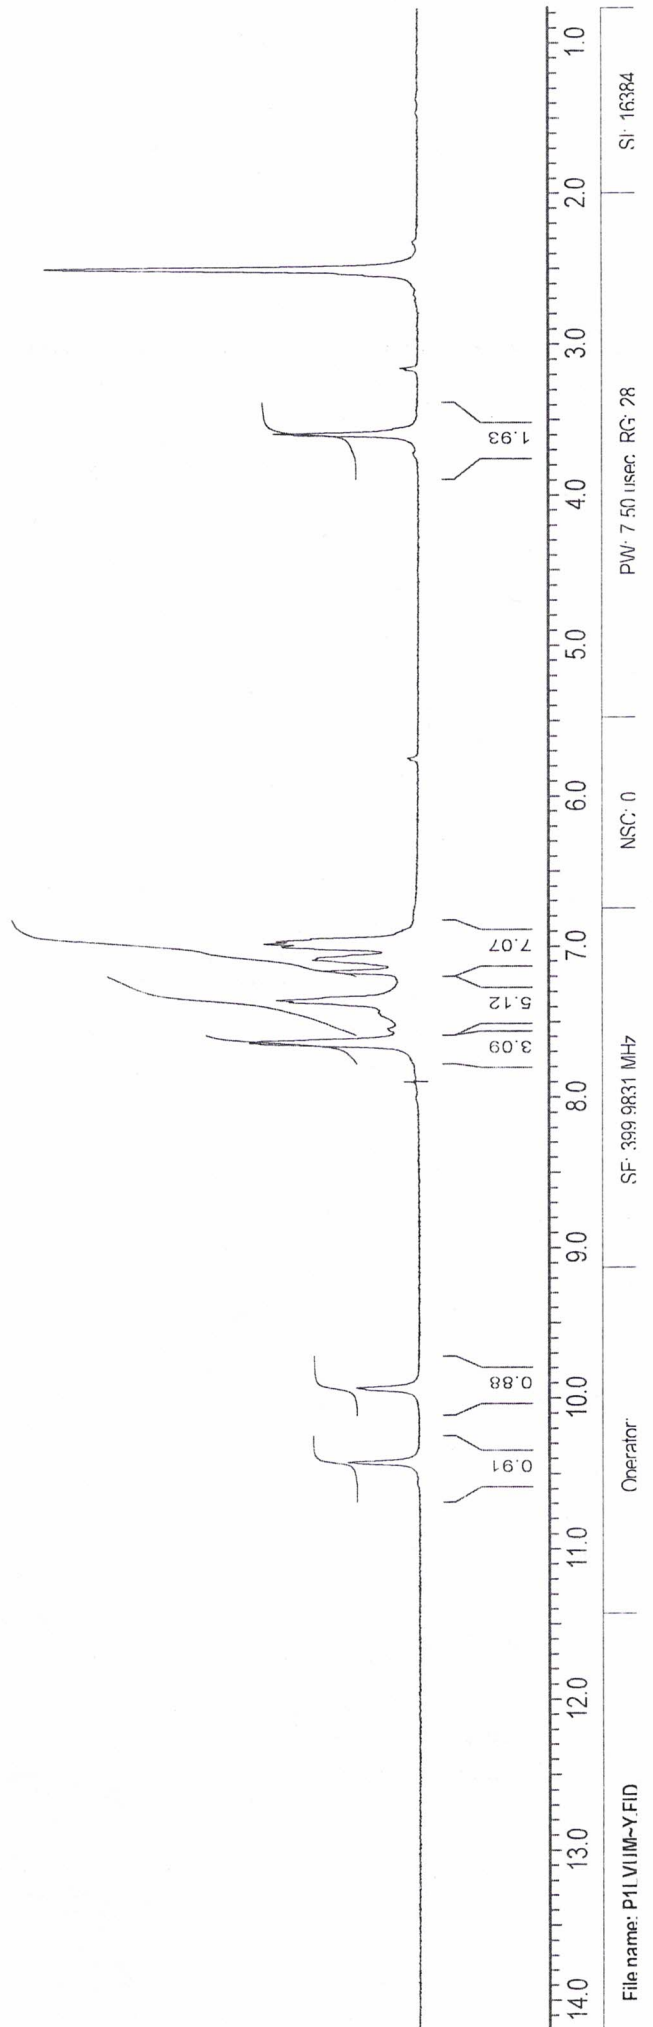

e2

MaxPeak: 96.45%  
Ret\_Time: 1.364 min

# PDM-9847

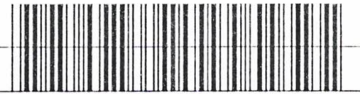

Mol Wt 0  
Exact Mass

| Time  | Area% |
|-------|-------|
| 0.575 | 3.55  |
| 1.364 | 96.45 |

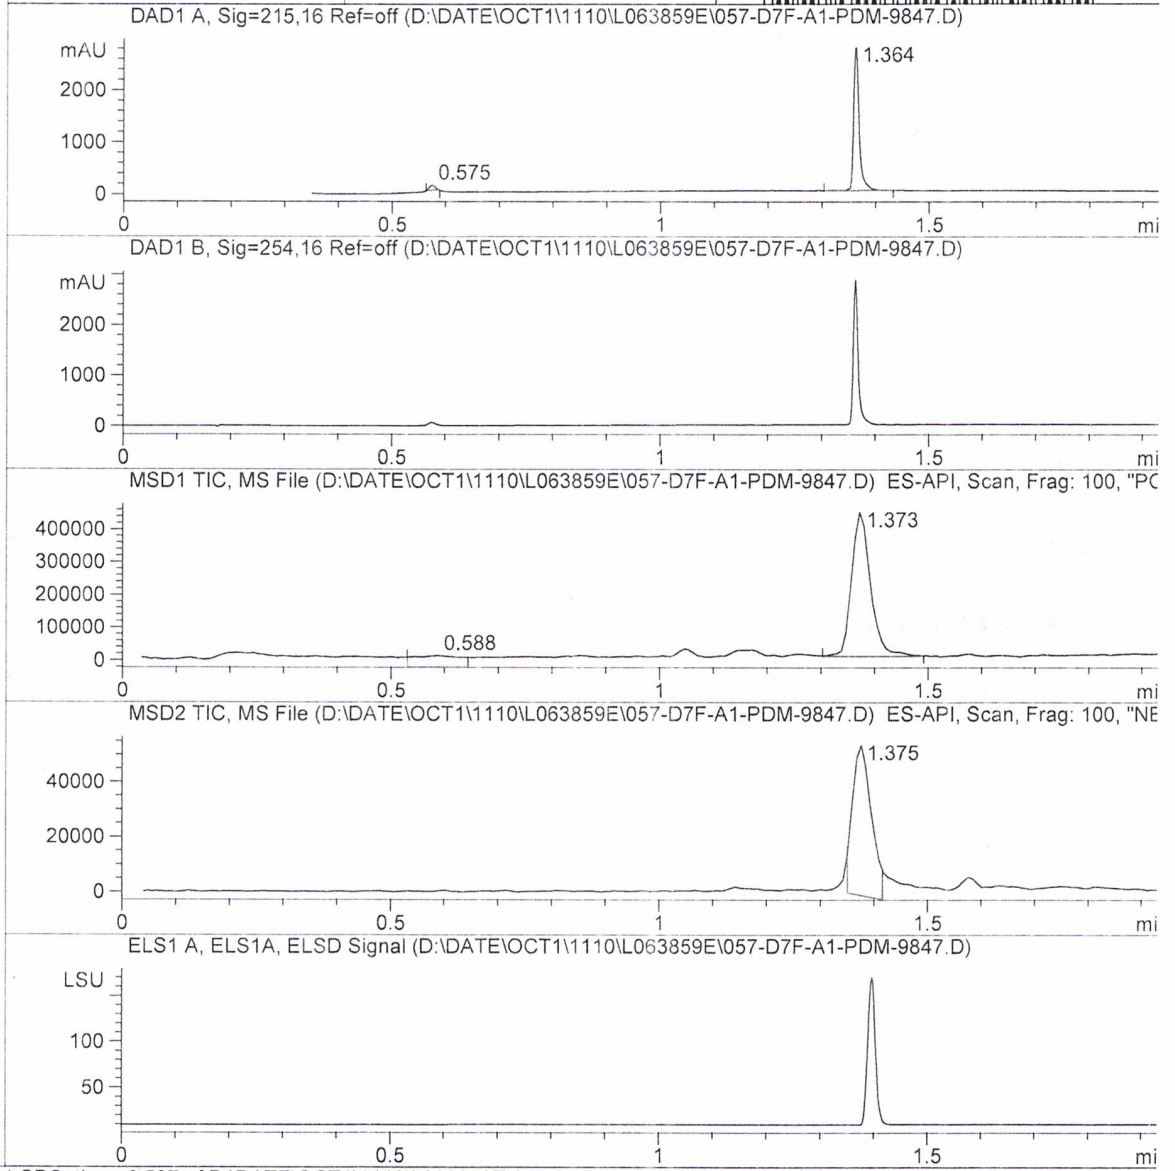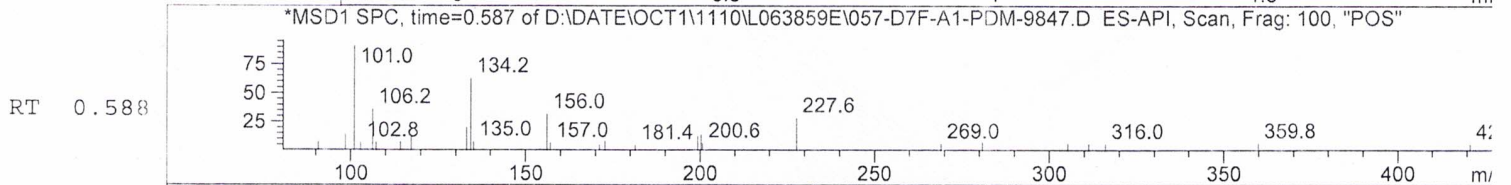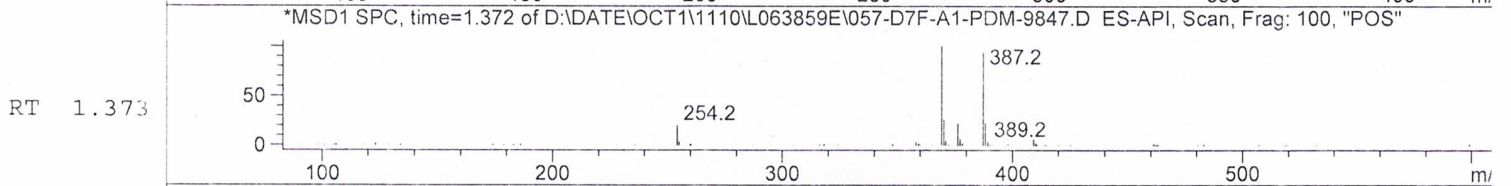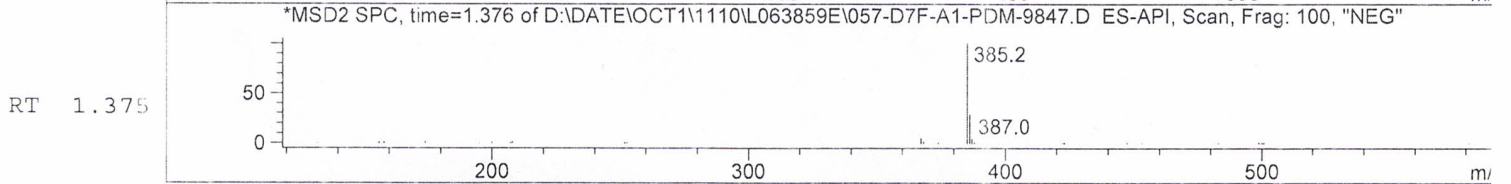



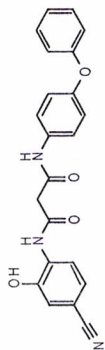

D63

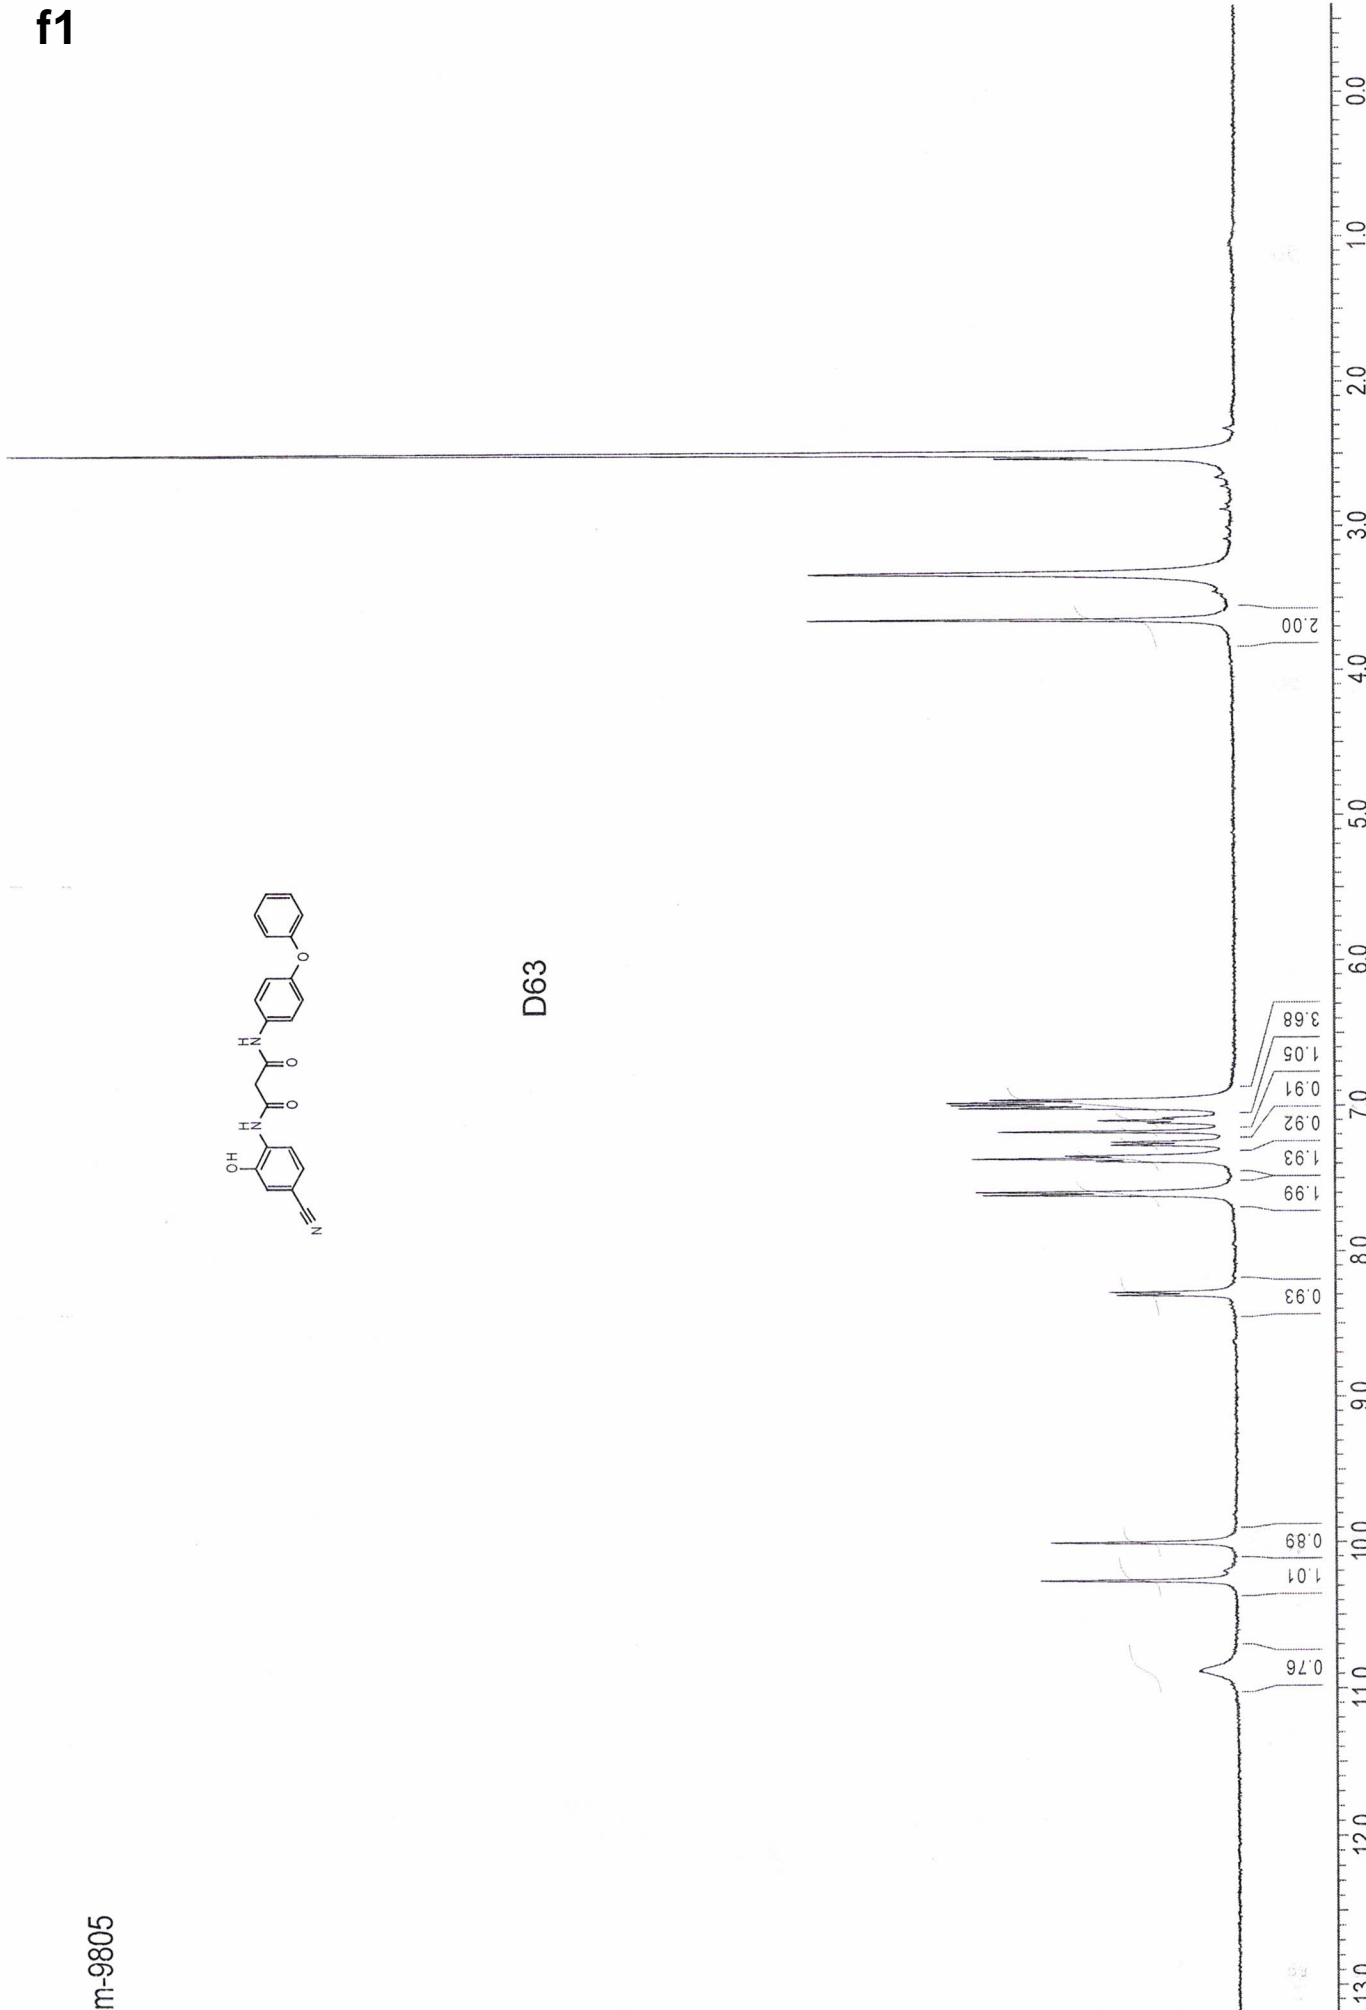

|                     |                  |                  |           |                            |           |
|---------------------|------------------|------------------|-----------|----------------------------|-----------|
| File name: pdm-9805 | Operator: USER 1 | SF: 400.1300 MHz | NSC: 1    | PW: 0.00 usec, RG: 25      | St: 32768 |
| Date: 29-Sep-2017   | Solvent: DMSO    | SW: 8224 Hz      | TE: 300 K | AQ: 1.99 sec, RD: 0.00 sec | E         |

f2

MaxPeak: 100.00%  
Ret\_Time: 1.394 min

D63

# PDM-9805

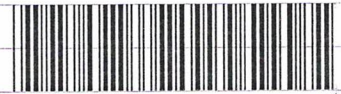

Mol Wt 0

Exact Mass

| # | Time  | Area%  |
|---|-------|--------|
| 1 | 1.394 | 100.00 |

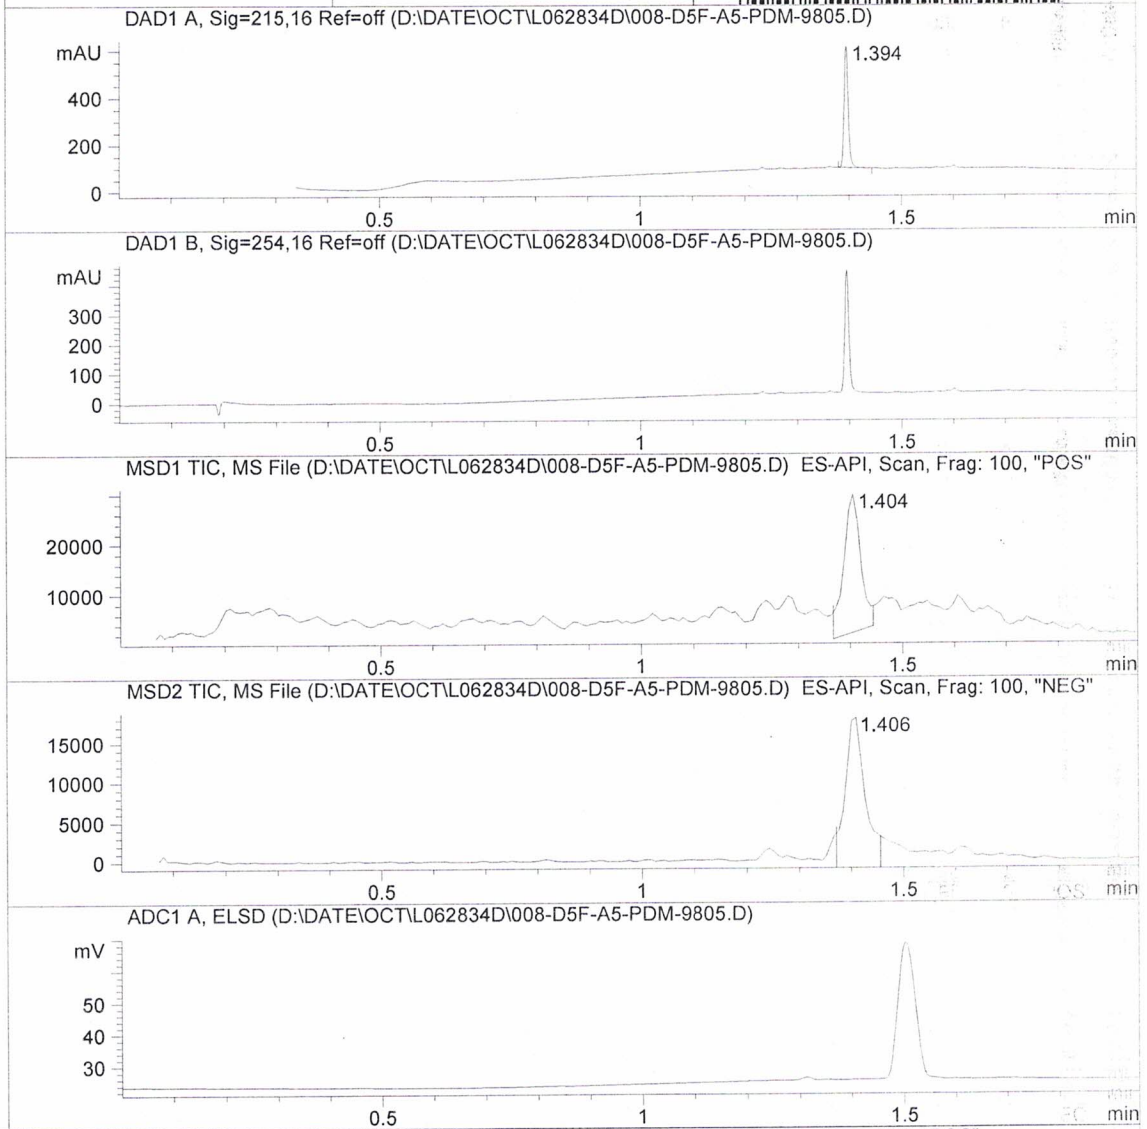

RT 1.404

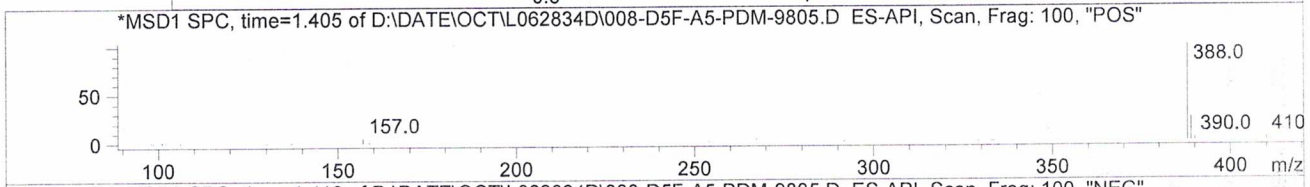

RT 1.406

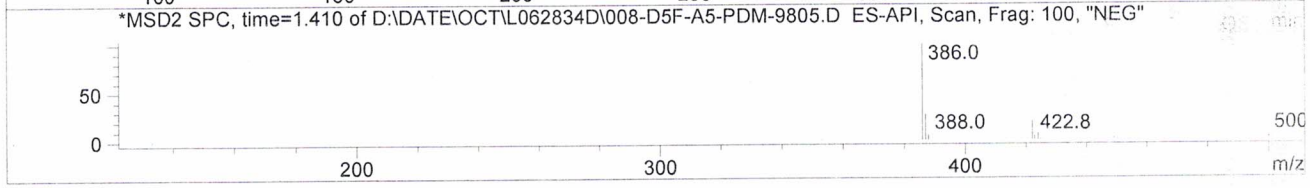

g1

dm9757.fid

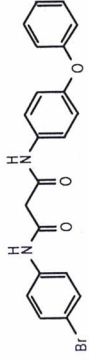

D64

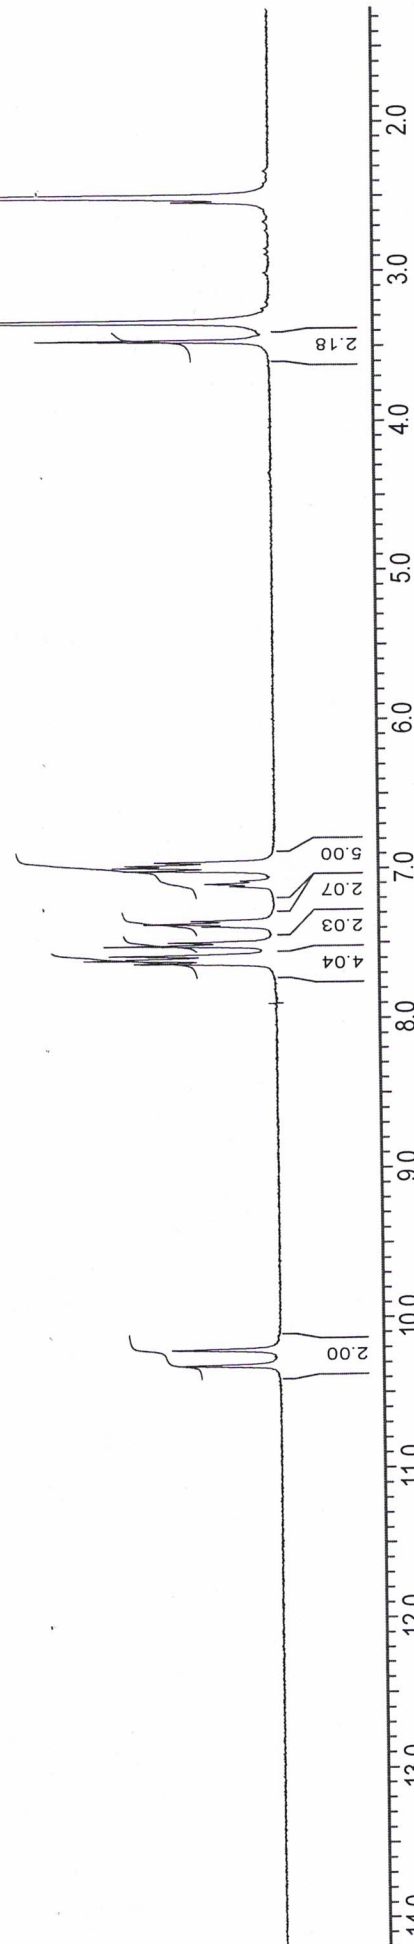

|                        |                  |                  |           |                            |           |
|------------------------|------------------|------------------|-----------|----------------------------|-----------|
| File name: pdm9757.fid | Operator:        | SF: 399.9831 MHz | NSC: 0    | PW: 7.50 usec, RG: 30      | SI: 16384 |
| Date: 26-Sep-2017      | Solvent: dmso_d6 | SW: 7639 Hz      | TE: 293 K | AC: 1.05 sec, RD: 0.00 sec |           |

g2

MaxPeak: 97.80%  
Ret\_Time: 1.558 min

# PDM-9757

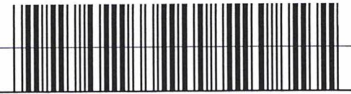

Mol Wt

0

Exact Mass

| Time  | Area% |
|-------|-------|
| 1.558 | 97.80 |
| 1.610 | 2.20  |

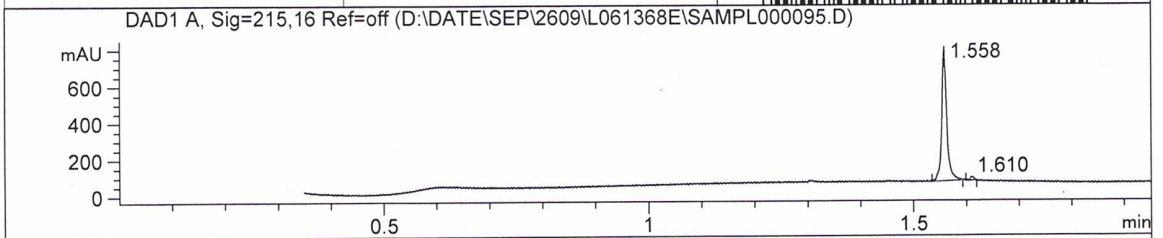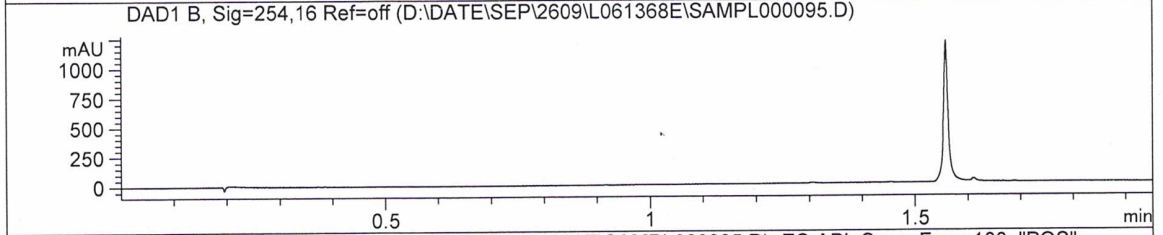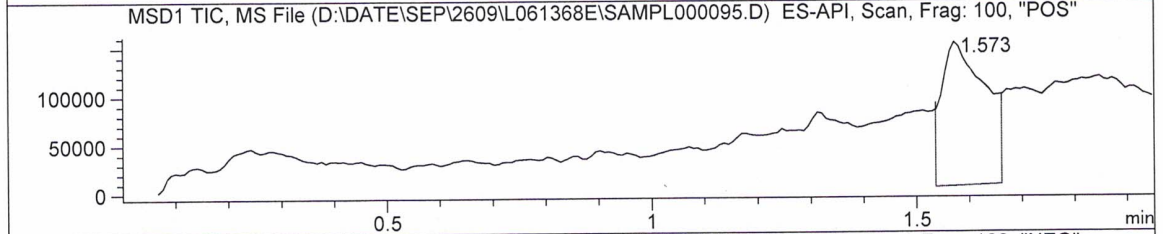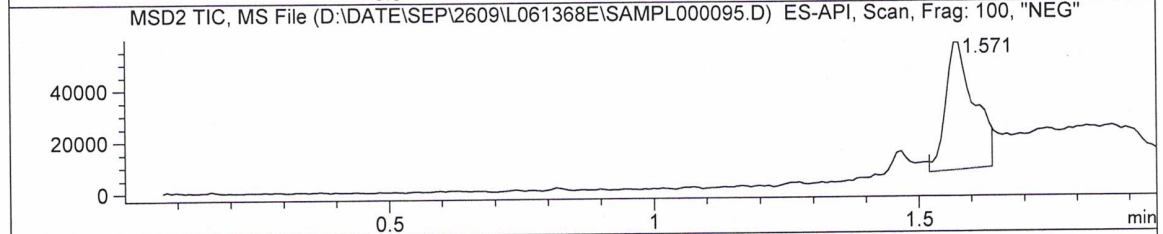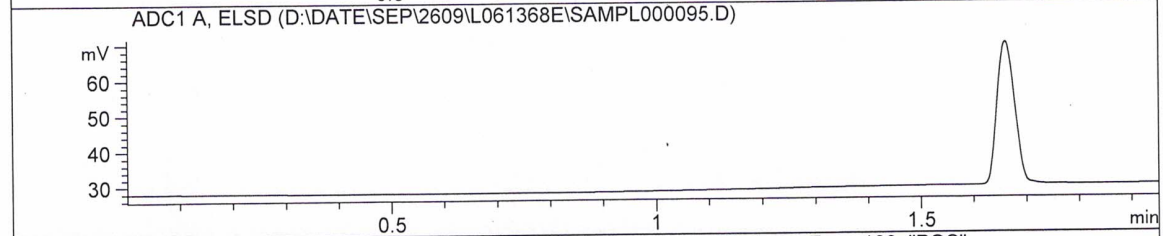

RT 1.573

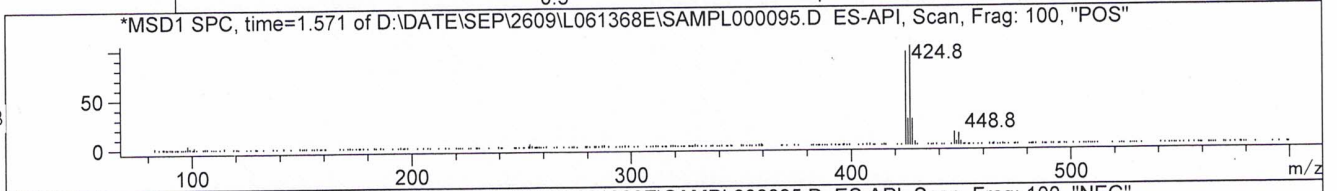

RT 1.571

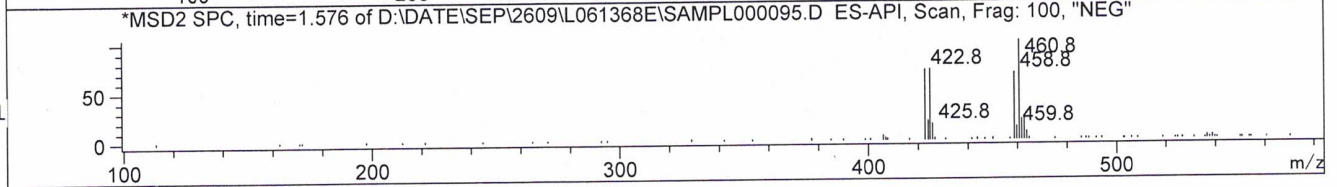

# h1

<sup>1</sup>H NMR spectrum of **D88**:

6894-2.fid

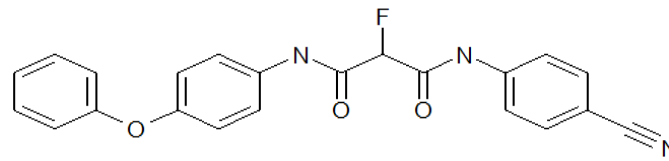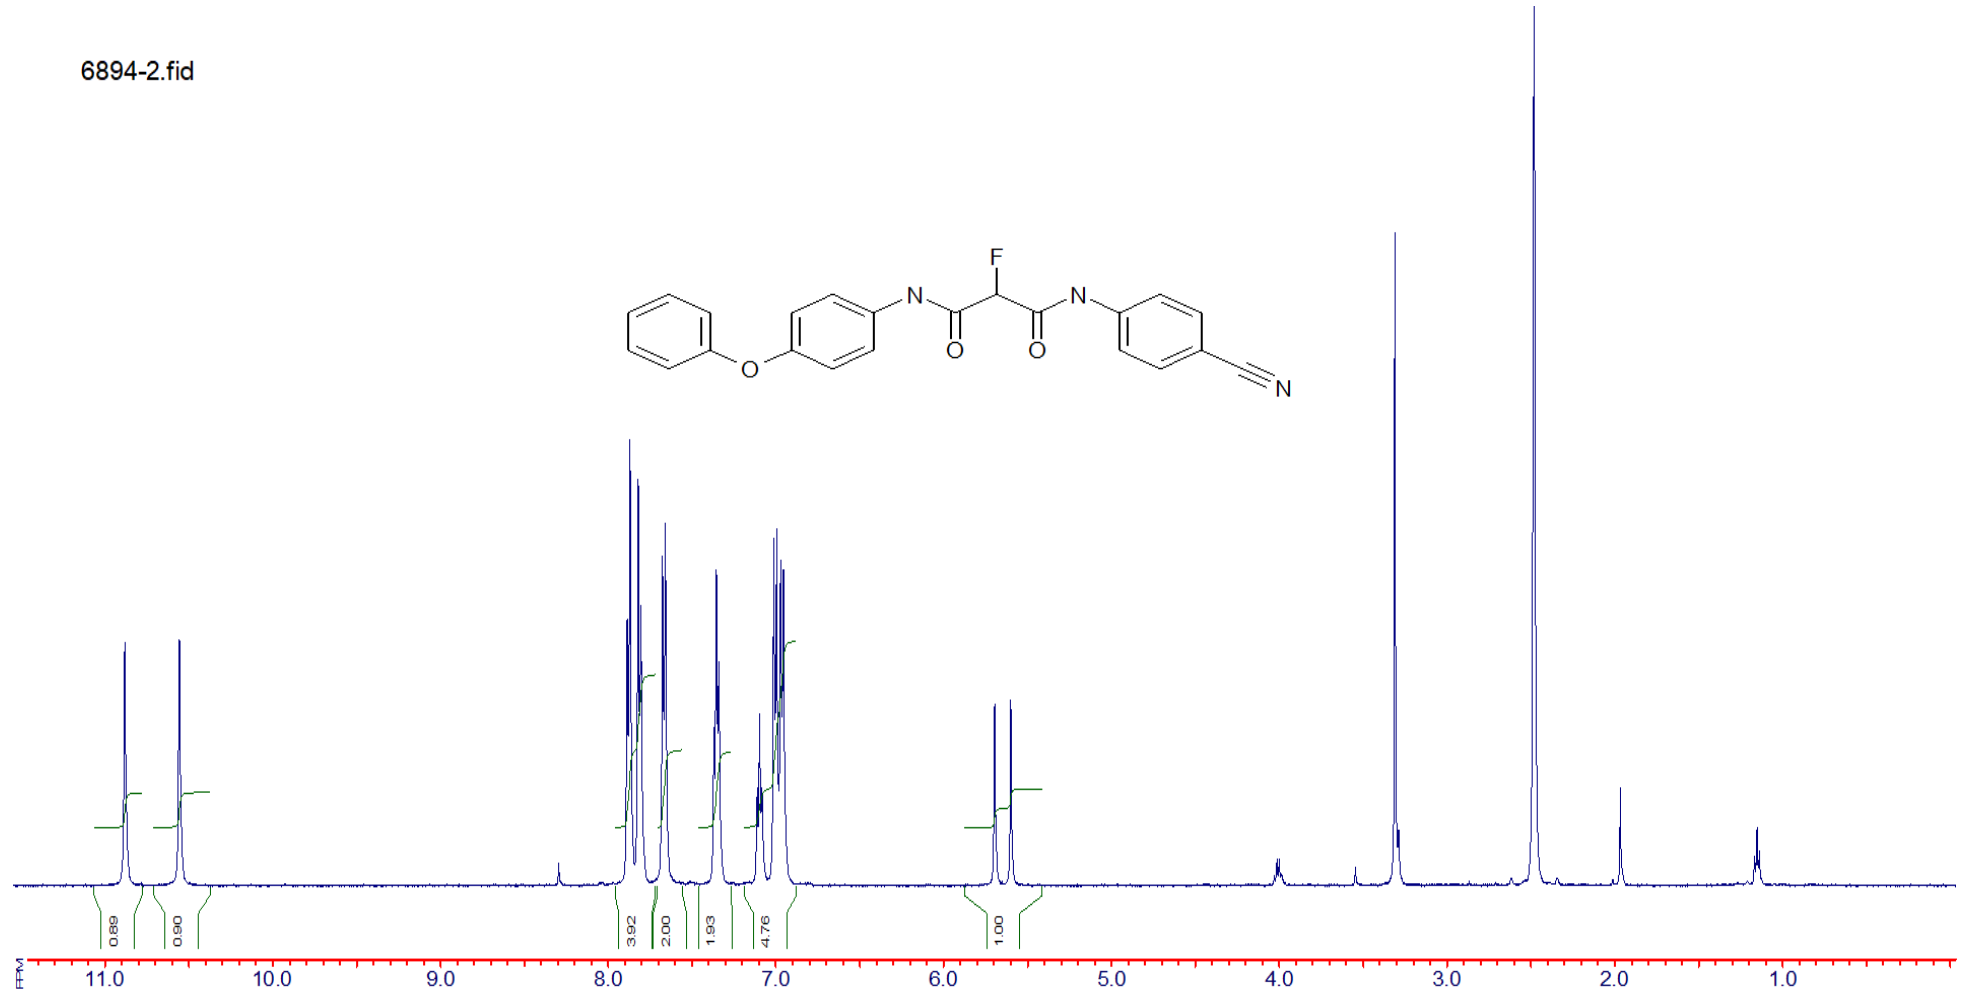

|                       |                |                  |           |                            |           |
|-----------------------|----------------|------------------|-----------|----------------------------|-----------|
| File name: 6894-2.fid | Operator:      | SF: 499.8203 MHz | NSC: 0    | PW: 7.20 usec, RG: 12      | SI: 32768 |
| Date: 06-Apr-2020     | Solvent: dmsol | SW: 9470 Hz      | TE: 293 K | AQ: 1.69 sec, RD: 0.00 sec |           |

LC/MS of **D88**:

MaxPeak: 100.00%  
Ret\_Time: 1.381 min

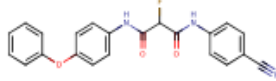

Mol Wt 389.38  
Exact Mass 389.13

| # | Time  | Area%  |
|---|-------|--------|
| 1 | 1.381 | 100.00 |

R1718363

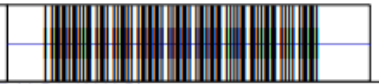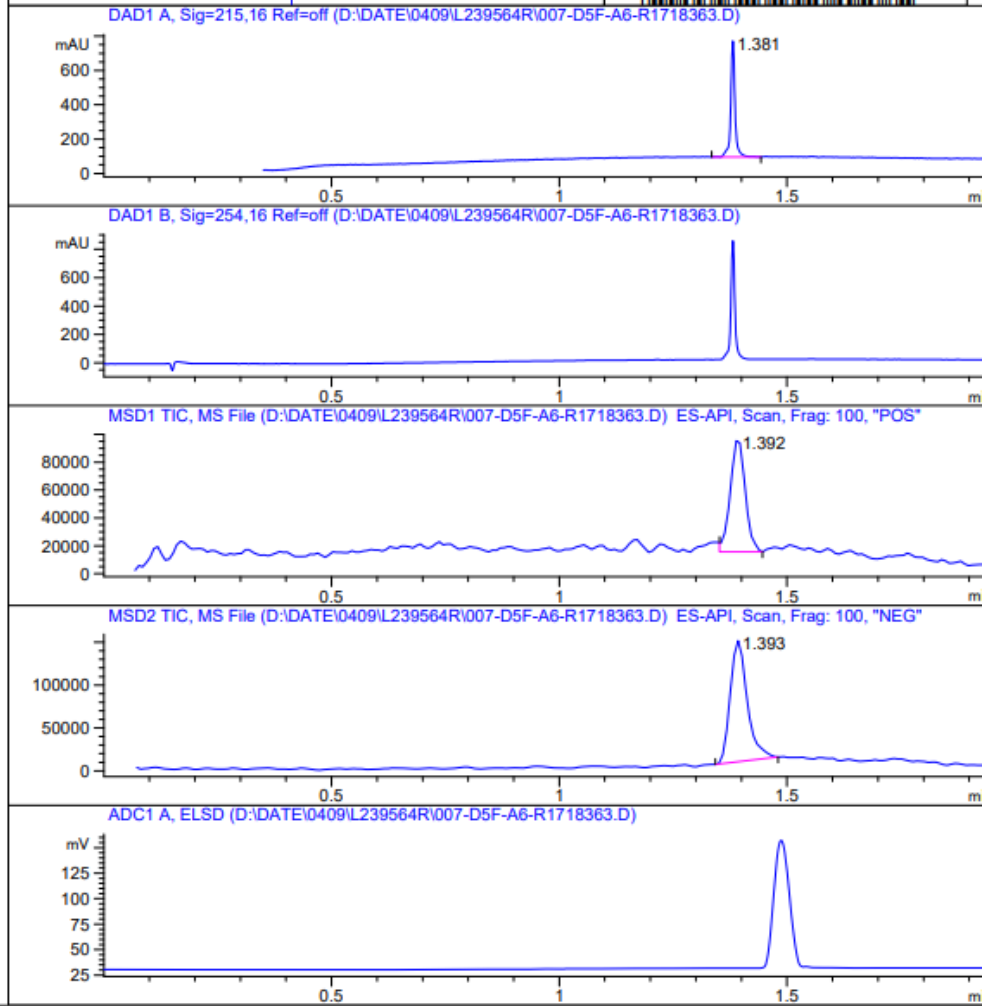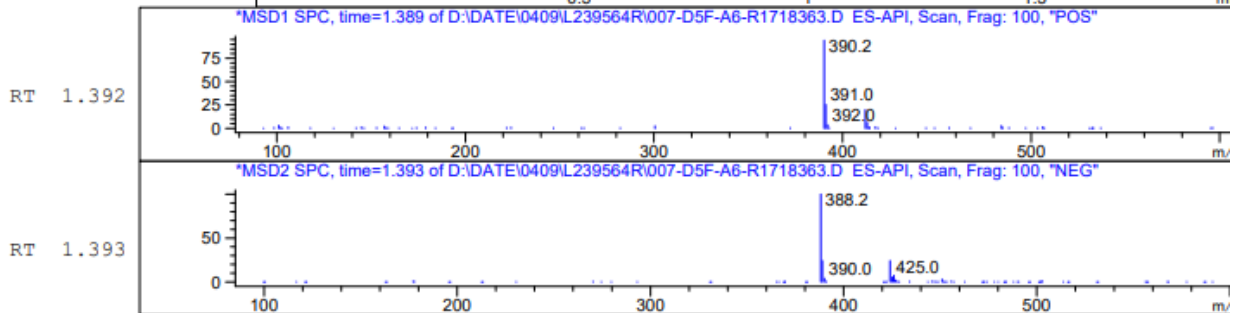

Supplement: 41467_2022_32833_MOESM1_ESM.pdf [file 41467_2022_32833_MOESM1_ESM.pdf]
